# Supplementary material for: P1′ Residue-Oriented Virtual Screening for Potent and Selective Phosphinic (Dehydro) Dipeptide Inhibitors of Metallo-Aminopeptidases
Source: PubMed Central journal article supplement (PMC7225938; doi:10.3390/biom10040659), 2020-04-24
Supplement: biomolecules-10-00659-s001.pdf [file biomolecules-10-00659-s001.pdf]

Supplementary materials for

# P1' residue-oriented virtual screening for potent and selective phosphinic (dehydro)dipeptide inhibitors of metallo-aminopeptidases

Michał Talma<sup>1</sup> and Artur Mucha<sup>1,\*</sup>

<sup>1</sup> Department of Bioorganic Chemistry, Wrocław University of Science and Technology, Wybrzeże Wyspiańskiego 27, 50-370 Wrocław, Poland; michal.talma@pwr.edu.pl, artur.mucha@pwr.edu.pl

\* Correspondence: artur.mucha@pwr.edu.pl; Tel.: +48-71-320-3446 (A.M.)

## Contents:

|                                                                                                                                                                                                                                                                            |           |
|----------------------------------------------------------------------------------------------------------------------------------------------------------------------------------------------------------------------------------------------------------------------------|-----------|
| <b>S1. List of commercially available aldehydes considered in the study</b>                                                                                                                                                                                                | <b>3</b>  |
| <b>S2. Full list of enzymes and the best inhibitors</b>                                                                                                                                                                                                                    | <b>11</b> |
| Table S1. The full list of enzymes with preferred P1' substituents that were the most favored, had the best interaction with the catalytic metal ion via the phosphinate group, and were the most specific                                                                 | 11        |
| <b>S3. ADMET properties of the best selected inhibitors from the Table S1</b>                                                                                                                                                                                              | <b>16</b> |
| Table S2. Selected ADMET properties for the best inhibitors                                                                                                                                                                                                                | 16        |
| <b>S4. Additional figures mentioned in the main text</b>                                                                                                                                                                                                                   | <b>21</b> |
| Figure S1. Modeled binding mode of a phosphinic dipeptide analog containing a 5-aminothiophen-2-yl P1' fragment in the active center of human aminopeptidase N (PDB: 4FYT)                                                                                                 | 21        |
| Figure S2. Modeled binding mode of a phosphinic dipeptide analog containing a quinolin-4-yl P1' fragment in the active center of Neisseria meningitidis aminopeptidase (PDB: 2GTQ)                                                                                         | 22        |
| Figure S3. Modeled binding mode of a phosphinic dipeptide analog containing quinolin-4-yl (carbon atoms are colored light green) and biphenyl-2-yl (carbon atoms are colored gray) P1' fragments in the active center of Neisseria meningitidis aminopeptidase (PDB: 2GTQ) | 23        |
| Figure S4. Modeled binding mode of a phosphinic dipeptide analog containing a 2-benzyloxyphenyl P1' fragment in the active center of ERAP2 aminopeptidase (PDB: 5AB0)                                                                                                      | 24        |
| Figure S5. Modeled binding mode of a phosphinic dehydrodipeptide analog containing a diphenylmethyl P1' fragment in the active center of ERAP2 aminopeptidase (PDB: 5AB0)                                                                                                  | 25        |
| Figure S6. Modeled binding mode of a phosphinic dipeptide analog containing a 2-tert-butylthiophenyl P1' fragment in the active center of cold-active aminopeptidase (PDB: 5AB0)                                                                                           | 26        |
| Figure S7. Modeled binding mode of a phosphinic dipeptide analog containing a 3-isobutylaziridin-2-yl P1' fragment in the active center of aminopeptidase A (PDB: 4KX7)                                                                                                    | 27        |

Figure S8. Modeled binding mode of a phosphinic dipeptide analog containing a 3,4-dibenzyloxyphenyl P1' fragment in the active center of aspartyl aminopeptidase (PDB: 4DYO) 28

Figure S9. Modeled binding mode of a phosphinic dipeptide analog containing a 3-phenylaziridin-2-yl P1' fragment in the active center of aminopeptidase P3 (PDB: 5X49) 29

Figure S10. Modeled binding mode of a phosphinic dipeptide analog containing a 4-borono-2,3-difluorophenyl P1' fragment in the active center of methionyl aminopeptidase 2 (PDB: 1B6A) 30

**S5. References 31**

## S1. List of commercially available aldehydes considered in the study

Formaldehyde, acetaldehyde, trifluoroacetaldehyde, tribromoacetaldehyde, sodium glyoxylate, chloroacetaldehyde, 2-bromoacrolein, methylglyoxal, propionaldehyde, glyceraldehyde, 2,4-dichlorothiazole-5-carboxyaldehyde, heptafluorobutyraldehyde, 4-bromothiazole-2-carboxyaldehyde, 2-thazolecarboxaldehyde, 5-thiazolecarboxyaldehyde, 4-oxazolecarboxyaldehyde, 2-imidazolecarboxyaldehyde, 4-imidazolecarboxyaldehyde, 2-aminothiazole-5-carboxaldehyde, crotonaldehyde, cyclopropanecarboxaldehyde, methacrolein, butyraldehyde, isobutyraldehyde, 3-(methylthio)propionaldehyde, 3-methoxy-propionaldehyde, aldol aldrich, 2,2-dimethoxyacetaldehyde, 3,4-dibromothiophene-2-carboxaldehyde, 4-bromothiophene-2-carboxaldehyde, 3-bromothiophene-2-carboxaldehyde, 5-bromo-2-thiophenecarboxaldehyde, 4,6-dichloropyrimidine-5-carboxaldehyde, 2-amino-4,6-dichloropyrimidine-5-carboxaldehyde, 4-bromo-2-furaldehyde, 5-bromo-2-furaldehyde, 5-chloro-2-furaldehyde, 5-chloro-2-thiophenecarboxaldehyde, 5-nitro-2-thiophenecarboxaldehyde, 5-nitro-2-furaldehyde, 5-formyluracil, 2-thiophenecarboxaldehyde, 3-furancarboxaldehyde, 3-furancarboxaldehyde, furfural, 2-formyl-3-thiopheneboronic acid, 3-formyl-2-thienylboronic acid, 5-formyl-2-thienylboronic acid, 5-formyl-2-furanylboronic acid, 4-bromo-1-methyl-1H-imidazole-5-carboxaldehyde, pyrrole-2-carboxaldehyde, 4-methyl-2-thiazolecarboxaldehyde, 2-methylthiazole-4-carboxaldehyde, 4-methylthiazole-5-carboxaldehyde, 2-methylloxazole-4-carboxaldehyde, 5-methylisoxazole-3-carboxaldehyde, 2-aminopyrimidine-5-carboxaldehyde, 1-methyl-1H-pyrazole-4-carboxaldehyde, 1-methyl-2-imidazolecarboxaldehyde, 1-methyl-5-imidazolecarboxaldehyde, 4-methyl-1H-imidazole-2-carboxaldehyde, 4-methyl-5-imidazolecarboxaldehyde, 3-methylcrotonaldehyde, 4-pentenal, *trans*-2-pentenal, tetrahydrofuran-3-carboxaldehyde, methyl 4-oxobutanoate, 3-dimethylaminoacrolein, 2-methylbutyraldehyde, isovaleraldehyde, trimethylacetaldehyde, valeraldehyde, 3,5-dibromo-4-pyridinecarboxaldehyde, 3,5-dibromopyridine-2-carboxaldehyde, 2-chloro-4-iodopyridine-3-carboxaldehyde, 2-amino-4-chloro-5-formyl-3-thiophenecarbonitrile, 2,4-dichloropyridine-3-carboxaldehyde, 2,6-dichloro-4-pyridinecarboxaldehyde, 2,6-dichloropyridine-3-carboxaldehyde, 3,5-dichloro-4-pyridinecarboxaldehyde, 2-bromo-3-pyridinecarboxaldehyde, 2-bromo-4-pyridinecarboxaldehyde, 5-bromo-2-pyridinecarboxaldehyde, 3-bromo-4-pyridinecarboxaldehyde, 5-bromo-3-pyridinecarboxaldehyde, 6-bromo-2-pyridinecarboxaldehyde, 6-bromo-3-pyridinecarboxaldehyde, 2-chloro-3-pyridinecarboxaldehyde, 2-chloro-4-pyridinecarboxaldehyde, 3-chloro-4-pyridinecarboxaldehyde, 5-chloropyridine-2-carboxaldehyde, 6-chloropyridine-3-carboxaldehyde, 2-fluoro-3-pyridinecarboxaldehyde, 3-fluoro-4-pyridinecarboxaldehyde, 4-bromo-3-methylthiophene-2-carboxaldehyde, 2-pyridinecarboxaldehyde, 3-pyridinecarboxaldehyde, 4-pyridinecarboxaldehyde, 2-amino-3-pyridinecarboxaldehyde, 4-methylthiophene-2-carboxaldehyde, 5-methyl-2-thiophenecarboxaldehyde, 5-methylfurfural, 5-hydroxymethyl-2-furaldehyde, N-methyl-2-pyrrolecarboxaldehyde, 2,4-dimethylthiazole-5-carboxaldehyde, 4,5-dimethylthiazole-2-carboxaldehyde, 3-(N-formyl-N-methylamino)-2-(trifluoromethyl)propionic acid, *trans,trans*-2,4-hexadienal, 2-methyl-2-pentenal, *trans*-2-hexen-1-al, cyclopentanecarboxaldehyde, (*R*)-(+)-2,2-dimethyl-1,3-dioxolane-4-carboxaldehyde, 2,2-dimethylbutanal, 2-ethylbutyraldehyde, 2-methylpentanal, 3,3-dimethylbutyraldehyde, hexanal,

2,3,5,6-tetrafluorobenzaldehyde, 4-bromo-2,6-difluorobenzaldehyde, 3,6-dibromo-2-fluorobenzaldehyde, 2,4,6-tribromo-3-hydroxybenzaldehyde, 2-chloro-3,6-difluorobenzaldehyde, 3-chloro-2,6-difluorobenzaldehyde, 4-chloro-2,6-difluorobenzaldehyde, 2,3,6-trichlorobenzaldehyde, 2,3,5-trifluorobenzaldehyde, 3,4,5-trifluorobenzaldehyde, 2,4,5-trifluorobenzaldehyde, 2-bromo-4-chlorobenzaldehyde, 3-bromo-5-chlorobenzaldehyde, 3-bromo-5-chloro-4-hydroxybenzaldehyde, 3-bromo-5-chlorosalicylaldehyde, 2-bromo-5-fluorobenzaldehyde, 2-bromo-6-fluorobenzaldehyde, 3-bromo-4-fluorobenzaldehyde, 4-bromo-3-fluorobenzaldehyde, 4-bromo-2-fluorobenzaldehyde, 5-bromo-2-fluorobenzaldehyde, 5-bromo-3-fluorobenzaldehyde, 5-bromo-3-fluorosalicylaldehyde, 3-bromo-5-nitrobenzaldehyde, 4-bromo-5-nitrobenzaldehyde, 3-bromo-5-nitrosalicylaldehyde, 5-bromo-3-nitrosalicylaldehyde, 2,5-dibromobenzaldehyde, 3,5-dibromobenzaldehyde, 3,5-dibromo-4-hydroxybenzaldehyde, 2,5-dibromosalicylaldehyde, 2-chloro-4-fluorobenzaldehyde, 2-chloro-6-fluorobenzaldehyde, 3-chloro-2-fluorobenzaldehyde, 4-chloro-3-fluorobenzaldehyde, 3-chloro-5-fluoro-4-hydroxybenzaldehyde, 3-chloro-5-fluorosalicylaldehyde, 5-chloro-2-hydroxy-3-iodobenzaldehyde, 2-chloro-5-nitrobenzaldehyde, 2-chloro-6-nitrobenzaldehyde, 4-chloro-2-nitrobenzaldehyde, 4-chloro-3-nitrobenzaldehyde, 5-chloro-2-nitrobenzaldehyde, 2,3-dichlorobenzaldehyde, 2,4-dichlorobenzaldehyde, 2,5-dichlorobenzaldehyde, 2,6-dichlorobenzaldehyde, 3,4-dichlorobenzaldehyde, 3,5-dichlorobenzaldehyde, 2,4-dichloro-6-hydroxybenzaldehyde, 3,5-dichlorosalicylbenzaldehyde, 2-fluoro-5-iodobenzaldehyde, 2-fluoro-6-iodobenzaldehyde, 2-fluoro-5-nitrobenzaldehyde, 4-fluoro-3-nitrobenzaldehyde, 2,3-difluorobenzaldehyde, 2,4-difluorobenzaldehyde, 2,5-difluorobenzaldehyde, 2,6-difluorobenzaldehyde, 3,4-difluorobenzaldehyde, 3,5-difluorobenzaldehyde, 3,5-difluorosalicylaldehyde, 3,5-diiodosalicylaldehyde, 3,5-dinitrosalicylaldehyde, 2,4-dinitrobenzaldehyde, 2,6-dinitrobenzaldehyde, 6-(trifluoromethyl)pyridine-3-carboxyaldehyde, 2,3-difluoro-4-formylphenylboronic acid, 2,6-difluoro-3-formylphenylboronic acid, 2,4-difluoro-3-formylphenylboronic acid, 3,5-difluoro-4-formylphenylboronic acid, 2-bromobenzaldehyde, 3-bromobenzaldehyde, 4-bromobenzaldehyde, 2-bromo-3-hydroxybenzaldehyde, 2-bromo-5-hydroxybenzaldehyde, 3-bromo-2-hydroxybenzaldehyde, 3-bromo-4-hydroxybenzaldehyde, 4-bromo-2-hydroxybenzaldehyde, 5-bromosalicylaldehyde, 2-amino-3,5-dibromobenzaldehyde, 2-chlorobenzaldehyde, 3-chlorobenzaldehyde, 4-chlorobenzaldehyde, 2-chloro-3-hydroxybenzaldehyde, 2-chloro-4-hydroxybenzaldehyde, 2-chloro-6-hydroxybenzaldehyde, 3-chloro-2-hydroxybenzaldehyde, 3-chloro-4-hydroxybenzaldehyde, 5-chlorosalicylaldehyde, 2-fluorobenzaldehyde, 3-fluorobenzaldehyde, 4-fluorobenzaldehyde, 5-fluorosalicylaldehyde, 3-fluorosalicylaldehyde, 2-amino-5-(trifluoromethyl)nicotinaldehyde, 2-iodobenzaldehyde, 3-iodobenzaldehyde, 4-iodobenzaldehyde, 5-iodosalicylaldehyd, 2-nitrobenzaldehyde, 3-nitrobenzaldehyde, 4-nitrobenzaldehyde, 2-hydroxy-3-nitrobenzaldehyde, 2-hydroxy-5-nitrobenzaldehyde, 3-hydroxy-4-nitrobenzaldehyde, 4-hydroxy-3-nitrobenzaldehyde, 5-hydroxy-2-nitrobenzaldehyde, 2-fluoro-3-formylphenylboronic acid, 2-fluoro-4-formylphenylboronic acid, 3-fluoro-2-formylphenylboronic acid, 3-fluoro-4-formylphenylboronic acid, 4-fluoro-3-formylphenylboronic acid, 5-bromo-2-methoxypyridine-3-carboxaldehyde, 6-chloro-2-methoxypyridine-3-carboxaldehyde, benzaldehyde, 3-hydroxybenzaldehyde, 4-hydroxybenzaldehyde, salicylaldehyde, *trans*-3-(2-furyl)acrolein, 2,4-dihydroxybenzaldehyde, 2,3-dihydroxybenzaldehyde, 2,5-dihydroxybenzaldehyde, 3,4-dihydroxybenzaldehyde, 3,5-

dihydroxybenzaldehyde, 2,3,4-trihydroxybenzaldehyde, 2,4,5-trihydroxybenzaldehyde, 2,4,6-trihydroxybenzaldehyde, 3,4,5-trihydroxybenzaldehyde, 2-formylphenylboronic acid, 3-formylphenylboronic acid, 4-formylphenylboronic acid, 2-aminobenzaldehyde, 2-methylpyridine-3-carboxaldehyde, 6-methylpyridine-2-carboxaldehyde, 3-methylpyridine-2-carboxaldehyde, 6-methylpyridine-3-carboxaldehyde, 2-methoxy-3-pyridinecarboxaldehyde, 6-methoxy-2-pyridinecarboxaldehyde, 6-methoxy-3-pyridinecarboxaldehyde, 5-methoxy-3-pyridinecarboxaldehyde, 4,5-dimethylthiophene-2-carboxaldehyde, 5-ethyl-2-thiophenecarboxaldehyde, 4,5-dimethyl-2-furaldehyde, 5-ethyl-2-furaldehyde, 3,5-dimethylpyrrole-2-carboxaldehyde, 1-cyclohexene-1-carboxaldehyde, 3-cyclohexene-1-carboxaldehyde, cyclohexanecarboxaldehyde, 2-chloro-6-methylbenzaldehyde, 2,4-heptadienal, ethyl 2-formyl-1-cyclopropanecarboxylate, ethyl 3-methyl-4-oxocrotonate, 2,2-dimethyl-4-pentenal, *cis*-4-hepten-1-al, *trans*-2-heptenal, heptenaldehyde, 2,5-dimethoxy-3-tetrahydrofurancarboxaldehyde, N-boc-2-aminoacetaldehyde, 3,5-difluoro-4-formylbenzotrile, 2-bromo-5-(trifluoromethyl)benzaldehyde, 3-bromo-5-(trifluoromethyl)benzaldehyde, 4-bromo-2-cyanobenzaldehyde, 2-chloro-3-(trifluoromethyl)benzaldehyde, 2-chloro-5-(trifluoromethyl)benzaldehyde, 3-chloro-5-(trifluoromethyl)benzaldehyde, 4-chloro-3-(trifluoromethyl)benzaldehyde, 5-chloro-2-(trifluoromethyl)benzaldehyde, 2-fluoro-5-formylbenzotrile, 4-cyano-3-fluorobenzaldehyde, 2,2-difluoro-5-formylbenzodioxole, 2-nitro-4-(trifluoromethyl)benzaldehyde, 2-fluoro-4-(trifluoromethyl)benzaldehyde, 2-fluoro-3-(trifluoromethyl)benzaldehyde, 2-fluoro-5-(trifluoromethyl)benzaldehyde, 2-fluoro-6-(trifluoromethyl)benzaldehyde, 4-fluoro-2-(trifluoromethyl)benzaldehyde, 4-fluoro-3-(trifluoromethyl)benzaldehyde, 3-fluoro-5-(trifluoromethyl)benzaldehyde, 3-bromo-1H-indazole-5-carboxaldehyde, 6-bromo-1,3-benzodioxole-5-carboxaldehyde, 5-bromo-1,3-benzodioxole-4-carboxaldehyde, 3-chloro-1H-indazole-5-carboxaldehyde, 2-(trifluoromethyl)benzaldehyde, 3-(trifluoromethyl)benzaldehyde, 4-(trifluoromethyl)benzaldehyde, 4-(trifluoromethylthio)benzaldehyde, 4-(trifluoromethoxy)benzaldehyde, 2-(trifluoromethoxy)benzaldehyde, 3-(trifluoromethoxy)benzaldehyde, 2-hydroxy-5-(trifluoromethoxy)benzaldehyde, 2-cyanobenzaldehyde, 3-formylbenzotrile, 4-formylbenzotrile, benzothiazole-2-carboxaldehyde, 6-nitropiperonal, 2-bromo-3-chloro-4-hydroxy-5-methoxybenzaldehyde, 3,5-dibromo-2-methoxybenzaldehyde, 3,5-dibromo-2-hydroxy-4-methoxybenzaldehyde, 6-chloro-2-fluoro-3-methylbenzaldehyde, 2,6-difluoro-4-methoxybenzaldehyde, 4-(difluoromethoxy)benzaldehyde, 2-(difluoromethoxy)benzaldehyde, 4-(difluoromethoxy)-3-hydroxybenzaldehyde, 1H-indazole-6-carboxaldehyde, indazole-5-carboxaldehyde, 7-azaindole-3-carboxaldehyde, 4-(1H-tetraazol-5-yl)benzaldehyde, phenylglyoxal, 2,3-(methylenedioxy)benzaldehyde, piperonal, 3-formyl-4-hydroxybenzoic acid, 4-formyl-3-hydroxybenzoic acid, 5-formylsalicylic acid, 2-formyl-4,5-methylenedioxyphenylboronic acid, 2-bromo-4-methylbenzaldehyde, 3-bromo-4-methylbenzaldehyde, 3-bromo-4-methoxybenzaldehyde, 2-bromo-4-methoxybenzaldehyde, 2-bromo-5-methoxybenzaldehyde, 4-bromo-2-methoxybenzaldehyde, 5-bromo-2-methoxybenzaldehyde, 2-bromo-3-hydroxy-4-methoxybenzaldehyde, 5-bromo-2-hydroxy-3-methoxybenzaldehyde, 5-bromovanillin, 6-bromo-2-hydroxy-3-methoxybenzaldehyde, 2-chloro-4-methylbenzaldehyde, 2-chloro-6-methylbenzaldehyde, 3-chloro-4-methylbenzaldehyde, 4-chloro-2-methylbenzaldehyde, 4-chloro-3-methylbenzaldehyde, 2-chloro-3-methoxybenzaldehyde, 3-chloro-

4-methoxybenzaldehyde, 2-chloro-3-hydroxy-4-methoxybenzaldehyde, 5-chloro-2-hydroxy-4-methyl-benzaldehyde, 3-chloro-4-hydroxy-5-methoxybenzaldehyde, 5-chloro-2-hydroxy-3-methoxybenzaldehyde, 2-fluoro-6-methylbenzaldehyde, 3-fluoro-2-methylbenzaldehyde, 3-fluoro-4-methylbenzaldehyde, 4-fluoro-2-methylbenzaldehyde, 4-fluoro-3-methylbenzaldehyde, 5-fluoro-2-methylbenzaldehyde, 2-fluoro-5-methoxybenzaldehyde, 2-fluoro-3-methoxybenzaldehyde, 2-fluoro-4-methoxybenzaldehyde, 2-fluoro-6-methoxybenzaldehyde, 3-fluoro-4-methoxybenzaldehyde, 4-fluoro-3-methoxybenzaldehyde, 5-fluoro-2-methoxybenzaldehyde, 5-fluoro-3-methylsalicylaldehyde, 3-fluoro-4-hydroxy-5-methoxybenzaldehyde, 3-iodo-4-methoxybenzaldehyde, 5-iodo-2-methoxybenzaldehyde, 3-hydroxy-2-iodo-4-methoxybenzaldehyde, 5-iodovanillin, 4-methyl-3-nitrobenzaldehyde, 2-methoxy-4-nitrobenzaldehyde, 2-methoxy-5-nitrobenzaldehyde, 3-methoxy-2-nitrobenzaldehyde, 4-methoxy-3-nitrobenzaldehyde, 2-hydroxy-5-methoxy-3-nitrobenzaldehyde, 3-methoxy-5-nitrosalicylaldehyde, 5-nitrovanillin, 3-bromo-5-formyl-2-methoxyphenylboronic acid, 5-fluoro-3-formyl-2-methoxyphenylboronic acid, *m*-tolualdehyde, *o*-tolualdehyde, *p*-tolualdehyde, phenylacetaldehyde, 2-(methylthio)benzaldehyde, 4-(methylthio)benzaldehyde, 2-hydroxy-3-methylbenzaldehyde, 2-hydroxy-5-methylbenzaldehyde, 2-methoxybenzaldehyde, 4-hydroxy-3-methylbenzaldehyde, *m*-anisaldehyde, *p*-anisaldehyde, 2,4-dihydroxy-6-methylbenzaldehyde, 2-hydroxy-4-methoxybenzaldehyde, 2-hydroxy-5-methoxybenzaldehyde, 2-hydroxy-6-methoxybenzaldehyde, 3-hydroxy-4-methoxybenzaldehyde, 4-hydroxy-2-methoxybenzaldehyde, vanillin, *o*-vanillin, 2,4-dihydroxy-5-methoxybenzaldehyde, 3,4-dihydroxy-5-methoxybenzaldehyde, 5-acetoxymethyl-2-furaldehyde, 3-formyl-5-methylphenylboronic acid, 2-formyl-4-methoxyphenylboronic acid, 3-formyl-2-methoxyphenylboronic acid, 3-formyl-4-methoxyphenylboronic acid, 2,6-dimethoxypyridine-3-carboxaldehyde, ethyl 4-formylpyrrole-2-carboxylate, pyridoxal, bicyclo[2.2.1]hept-5-ene-2-carboxaldehyde, bicyclo[2.2.1]heptane-2-carboxaldehyde, 5-(ethoxymethyl)furan-2-carboxaldehyde, 2-butyl-5-chloro-1*h*-imidazole-4-carboxaldehyde, 2-octynal, 2-ethyl-2-hexenal, *trans*-2-octenal, 2-ethylhexanal, octanal, *boc*-l-alaninal, aldehyde name, 2,5-bis(trifluoromethyl)benzaldehyde, 3,5-bis(trifluoromethyl)benzaldehyde, 3-bromobenzothiophene-2-carboxaldehyde, 5'-bromo-2,2'-bithiophene-5-carboxaldehyde, 5-bromoindole-3-carboxaldehyde, 6-bromoindole-3-carboxaldehyde, 5-chloroindole-3-carboxaldehyde, 5-fluoroindole-3-carboxaldehyde, 2,6-difluorocinnamic aldehyde, 3-(1,1,2,2-tetrafluoroethoxy)benzaldehyde, 4-(1,1,2,2-tetrafluoroethoxy)benzaldehyde, 7-iodoindole-3-carboxaldehyde, 4-nitroindole-3-carboxaldehyde, 2-ethynylbenzaldehyde, 3-ethynylbenzaldehyde, 4-ethynylbenzaldehyde, phenylpropargyl aldehyde, benzo[*b*]thiophene-2-carboxaldehyde, thianaphthene-3-carboxaldehyde, 2,2'-bithiophene-5-carboxaldehyde, 3,3'-bithiophene-5-carboxaldehyde, 2-benzofurancarboxaldehyde,  $\alpha$ -bromocinnamaldehyde, *trans*-4-bromocinnamaldehyde, 4-chlorocinnamaldehyde, 4-fluorocinnamaldehyde,  $\alpha$ -chlorocinnamaldehyde, (2-bromo-4-formylphenoxy)acetic acid, (4-chloro-2-formylphenoxy)acetic acid, 2-methyl-3-(trifluoromethyl)benzaldehyde, 4-methyl-3-(trifluoromethyl)benzaldehyde, 5-methyl-2-(trifluoromethyl)benzaldehyde, 2-methoxy-4-(trifluoromethoxy)benzaldehyde, indole-2-carboxaldehyde, indole-3-carboxaldehyde, indole-4-carboxaldehyde, indole-5-carboxaldehyde, indole-6-carboxaldehyde, indole-7-carboxaldehyde, 5-cyano-2-methoxybenzaldehyde, 4-nitrocinnamaldehyde, *trans*-2-nitrocinnamaldehyde, methyl 3-formyl-4-nitrobenzoate, methyl 4-

formyl-3-nitrobenzoate, 2-(2-formyl-4-nitrophenyl)sulfanylacetic acid, 2-bromo-3-chloro-5-ethoxy-4-hydroxybenzaldehyde, *trans*-cinnamaldehyde, 3-vinylbenzaldehyde, 2,3-dihydrobenzofuran-5-carboxaldehyde, 3-(2-hydroxyphenyl)-2-propenal, 2-acetylbenzaldehyde, 3-acetylbenzaldehyde, 4-acetylbenzaldehyde, 1,4-benzodioxan-6-carboxaldehyde, 4-acetoxybenzaldehyde, methyl 3-formylbenzoate, methyl 4-formylbenzoate, 2-formylphenoxyacetic acid, 4-formylphenoxyacetic acid, methyl 3-formyl-4-hydroxybenzoate, 4-bromo-3,5-dimethoxybenzaldehyde, 5-bromo-2,3-dimethoxybenzaldehyde, 5-bromo-2,4-dimethoxybenzaldehyde, 5-bromoveratraldehyde, 6-bromoveratraldehyde, 3-(3-chlorophenyl)propionaldehyde, 2-chloro-3,4-dimethoxybenzaldehyde, 3-chloro-4,5-dimethoxybenzaldehyde, 5-chloro-2,3-dimethoxybenzaldehyde, 3-iodo-4,5-dimethoxybenzaldehyde, 5-iodo-2,4-dimethoxybenzaldehyde, 3-chloro-6-hydroxy-2,4-dimethylbenzaldehyde, 2-iodo-4,5-dimethylbenzaldehyde, indoline-7-carboxaldehyde, 2-(3-formylphenoxy)acetamide, 4-acetamidobenzaldehyde, 4-ethyl-3-nitrobenzaldehyde, 4-ethoxy-3-nitrobenzaldehyde, 6-nitroveratraldehyde, 4-dimethylamino-2-nitrobenzaldehyde, 2,4-dimethylbenzaldehyde, 2,5-dimethylbenzaldehyde, 2,6-dimethylbenzaldehyde, 2-ethylbenzaldehyde, 2-phenylpropionaldehyde, 3,4-dimethylbenzaldehyde, 3,5-dimethylbenzaldehyde, 4-ethylbenzaldehyde, hydrocinnamaldehyde, 2-ethoxybenzaldehyde, 3-ethoxybenzaldehyde, 4-ethoxybenzaldehyde, 4-hydroxy-3,5-dimethylbenzaldehyde, 4-methoxy-2-methylbenzaldehyde, 4-methoxy-3-methylbenzaldehyde, benzyloxyacetaldehyde, 2,3-dimethoxybenzaldehyde, 2,4-dimethoxybenzaldehyde, 2,5-dimethoxybenzaldehyde, 2,6-dimethoxybenzaldehyde, 2-(2-hydroxyethoxy)benzaldehyde, 3,4-dimethoxybenzaldehyde, 3,5-dimethoxybenzaldehyde, 3-(2-hydroxyethoxy)benzaldehyde, 3-(methoxymethoxy)benzaldehyde, 3-ethoxy-4-hydroxybenzaldehyde, 3-ethoxysalicylaldehyde, 2,6-dimethoxy-4-hydroxybenzaldehyde, 3,4-dimethoxy-5-hydroxybenzaldehyde, 4,6-dimethoxysalicylaldehyde, syringaldehyde, 3-ethoxy-5-formylphenylboronic acid, 3-formyl-2-methoxy-5-methylphenylboronic acid, 4-ethoxy-3-formylphenylboronic acid, 4-(dimethylamino)benzaldehyde, 1-(2-tetrahydropyranyl)-1H-pyrazole-5-carboxaldehyde, *trans,trans*-2,4-nonadienal, *trans*-2,*cis*-6-nonadienal, (*R*)-1,4-dioxaspiro[4.5]decane-2-carboxaldehyde, 4-ethyl-4-formylhexanenitrile, 2,6-dimethyl-5-heptenal, *trans*-2-nonenal, nonenal, 3,5,5-trimethylhexanal, 3-cyclohexylpropionaldehyde, 3-phenylaziridine-2-carboxaldehyde, aldehyde name, 6-bromo-4-chloro-3-formylcoumarin, 6,8-dibromo-3-formylchromone, 6-bromo-3-formylchromone, 7-bromochromone-3-carboxaldehyde, 4-chloro-3-formylcoumarin, 7-fluorochromone-3-carboxaldehyde, 6-fluorochromone-3-carboxaldehyde, 3-formyl-6-nitrochromone, 4-chloro-6-fluoro-2H-benzopyran-3-carboxaldehyde, 2-chloro-3-quinolinecarboxaldehyde, 4,6-dichloro-2H-benzopyran-3-carboxaldehyde, 5-(4-chlorophenyl)isoxazole-3-carboxaldehyde, 5-(4-fluorophenyl)isoxazole-3-carboxaldehyde, 3,5-dichloro-4-(prop-2-yn-1-yloxy)benzaldehyde, 3-formyl-1H-indole-5-carbonitrile, 3-formylchromone, 3-(4-Fluorophenyl)-1H-pyrazole-4-carboxaldehyde, 2-quinolinecarboxaldehyde, 3-quinolinecarboxaldehyde, 4-quinolinecarboxaldehyde, 4-isoquinolinecarboxaldehyde, isoquinoline-5-carboxaldehyde, 2-thiazol-2-yl-benzaldehyde, 6-(2-thienyl)-2-pyridinecarboxaldehyde, 6-(3-thienyl)pyridine-2-carboxaldehyde, 5-phenylisoxazole-3-carboxaldehyde, 3-phenylisoxazole-5-carboxaldehyde, 8-hydroxy-2-quinolinecarboxaldehyde, 2-amino-3-formylchromone, 1-phenyl-1H-pyrazole-4-carboxaldehyde, 3-phenyl-1H-pyrazole-4-carboxaldehyde, 4-(1H-imidazol-1-yl)benzaldehyde, 3-methylbenzo[*b*]thiophene-2-carboxaldehyde, 5-(5-methylthiophen-2-

yl)thiophene-2-carbaldehyde, 3-(prop-2-yn-1-yloxy)benzaldehyde, 2-formylcinnamic acid, 4-formylcinnamic acid, 6-hydroxychromene-3-carboxaldehyde, 2-(4-bromo-2-formylphenoxy)propanoic acid, (2-bromo-4-formyl-6-methoxyphenoxy)acetic acid, (2-chloro-4-formyl-6-methoxy-phenoxy)-acetic acid, (5-chloro-4-formyl-2-methoxy-phenoxy)-acetic acid, 1-methylindole-3-carboxaldehyde, 1-methylindole-2-carboxaldehyde, 1-methyl-1H-indole-6-carboxaldehyde, 2-methylindole-3-carboxaldehyde, 2-methylindole-7-carboxaldehyde, 5-methylindole-3-carboxaldehyde, 5-methoxyindole-3-carboxaldehyde, 3-methyl-1H-indole-2-carboxaldehyde, 5-formyl-2-furanboronic acid MIDA,  $\alpha$ -methyl-*trans*-cinnamaldehyde, 2-allyloxybenzaldehyde, 3-allyl-4-hydroxybenzaldehyde, 3-allylsalicylaldehyde, 4-allyloxybenzaldehyde, 4-hydroxy-3-methoxycinnamaldehyde, 2-(4-formylphenoxy)propanoic acid, vanillin acetate, (4-formyl-2-methoxyphenoxy)acetic acid, 4-(2-bromoethoxy)-3-methoxybenzaldehyde, 4-(3-fluoropropoxy)benzenecarbaldehyde, 3-bromo-2-isopropoxy-5-formylphenylboronic acid, 2,4,5-trimethylbenzaldehyde, 4-iso-propylbenzaldehyde, 2-iso-propylbenzaldehyde, 3-iso-propylbenzaldehyde, 3-phenylbutyraldehyde, 4-propylbenzaldehyde, mesitaldehyde, 2,3-dimethyl-4-methoxybenzaldehyde, 2,5-dimethyl-4-methoxybenzaldehyde, 3-(4-methoxyphenyl)propionaldehyde, 3-benzyloxypropionaldehyde, 4-propoxybenzaldehyde, 2,4-dimethoxy-3-methylbenzaldehyde, 2,4-dimethoxy-6-methylbenzaldehyde, 2-ethoxy-3-methoxybenzaldehyde, 3-ethoxy-4-methoxybenzaldehyde, 4-ethoxy-3-methoxybenzaldehyde, 2,3,4-trimethoxybenzaldehyde, 2,4,5-trimethoxybenzaldehyde, 2,4,6-trimethoxybenzaldehyde, 3,4,5-trimethoxybenzaldehyde, 2-ethoxy-3-formyl-5-methylphenylboronic acid, 3-formyl-4-isopropoxyphenylboronic acid, 3-formyl-5-isopropoxyphenylboronic acid, 3-formyl-5-propoxyphenylboroni, 3-[(dimethylamino)methyl]-4-hydroxybenzaldehyde, N-methyl-N-(2-hydroxyethyl)-4-aminobenzaldehyde, N-boc-pyrrole-2-carboxaldehyde, (1R)-(-)-myrtenal, (S)-(-)-perillaldehyde, alpha-cyclociral, citral, *trans,trans*-2,4-decadienal, Boc-L-prolinal, Boc-D-prolinal, citronellal, *cis*-7-decenal, *cis*-4-decenal, decanal, 7-hydroxycitronellal, 6-chloro[1,3]dioxolo[4,5-g]quinoline-7-carboxaldehyde, 5-(4-chloro-2-nitrophenyl)furfural, 5-(2,4-dichlorophenyl)furfural, 5-(2,5-dichlorophenyl)furfural, 5-(3,4-dichlorophenyl)furfural, 1-bromo-2-naphthaldehyde, 5-(4-bromophenyl)furfural, 5-(2-chlorophenyl)furfural, 5-(3-chlorophenyl)furfural, 5-(4-chlorophenyl)furfural, 4-chloro-3-formyl-6-methylcoumarin, 6-chloro-3-formyl-7-methylchromone, 4-fluoro-1-naphthaldehyde, 1-nitro-2-naphthaldehyde, 5-(2-nitrophenyl)furfural, 3-(4-bromophenyl)-5-methylisoxazole-4-carboxaldehyde, 2-chloro-6-methylquinoline-3-carboxaldehyde, 2-chloro-8-methylquinoline-3-carboxaldehyde, 3-(4-chlorophenyl)-5-methylisoxazole-4-carboxaldehyde, 3-(4-fluorophenyl)-5-methylisoxazole-4-carboxaldehyde, 5-(4-formylphenyl)pyrimidine, 1-naphthaldehyde, 2-naphthaldehyde, 4-(2-thienyl)benzaldehyde, 4-phenylthiophene-2-carboxaldehyde, 5-phenylthiophene-2-carboxaldehyde, 1-hydroxy-2-naphthaldehyde, 2-hydroxy-1-naphthaldehyde, 4-hydroxy-1-naphthaldehyde, 5-phenyl-2-furaldehyde, 3-formyl-6-methylchromone, 6-methoxychromone-3-carboxaldehyde, 1-(4-bromophenyl)-5-methyl-1H-pyrazole-4-carboxaldehyde, 1-(4-fluorophenyl)-5-methyl-1H-pyrazole-4-carboxaldehyde, 5-chloro-3-methyl-1-phenyl-4-pyrazolecarboxaldehyde, 1-acetyl-3-indolecarboxaldehyde, (3-formyl-1-indolyl)acetic acid, 5-(4-methoxyphenyl)isoxazole-3-carboxaldehyde, 1-(phenylsulfonyl)-2-pyrrolecarboxaldehyde, 5-(4-methylphenyl)isoxazole-3-carboxaldehyde, 5-methyl-3-phenylisoxazole-4-carboxaldehyde, 5-methyl-1-phenyl-1H-pyrazole-4-



carboxaldehyde, 3-methyl-1-phenyl-1H-pyrazole-4-carboxaldehyde, 4-(4-hydroxybut-1-yn-1-yl)benzaldehyde, methyl 4-formylcinnamate, (2-chloro-6-ethoxy-4-formylphenoxy)acetic acid, 5-methoxy-4-methylindole-3-carboxaldehyde, 4-[(2-cyanoethyl)methylamino]benzaldehyde, 6-methoxyindane-5-carbaldehyde, *trans*-3,5-dimethoxy-4-hydroxycinnamaldehyde, methyl 2-formyl-3,5-dimethoxybenzoate, 4-[bis-(2-chloroethyl)amino]benzaldehyde, 4-(1-pyrrolidino)benzaldehyde, 4-(dimethylamino)cinnamaldehyde, 4-(4-morpholinyl)benzaldehyde, 3-[(benzyloxycarbonyl)amino]propionaldehyde, 4-butoxy-3-nitrobenzaldehyde, *n*-(3-formyl-2-pyridinyl)-2,2-dimethylpropanamide, 2,3,5,6-tetramethylbenzaldehyde, 4-butylbenzaldehyde, 4-isobutylbenzaldehyde, 4-*tert*-butylbenzaldehyde, 2-(*tert*-butylthio)benzaldehyde, (*r,s*)-3-benzyloxy-2-methylpropionaldehyde, 3-*tert*-butyl-2-hydroxybenzaldehyde, 4-(*tert*-butyloxy)benzaldehyde, 4-butoxybenzaldehyde, 2,3-diethoxybenzaldehyde, 2,4-diethoxybenzaldehyde, 2,5-diethoxybenzaldehyde, 3,4-diethoxybenzaldehyde, 5-*tert*-butyl-2-hydroxybenzaldehyde, 3-butoxy-5-formylphenylboronic acid, 3-formyl-2-isopropoxy-5-methylphenylboronic acid, 3-formyl-5-methyl-2-propoxyphenylboronic acid, 4-diethylaminobenzaldehyde, 4-(diethylamino)salicylaldehyde, 4-[N,N-bis(2-hydroxyethyl)amino]benzaldehyde, hexylthiophene-2-carboxaldehyde, 2,6,6-trimethyl-1-cyclohexene-1-acetaldehyde, 1-boc-piperidine-4-carboxaldehyde, N-boc-cycloleucinal, (*R*)-(+)-3-boc-2,2-dimethylloxazolidine-4-carboxaldehyde, undecanal, 5-[2-chloro-5-(trifluoromethyl)phenyl]furfural, 5-[2-(trifluoromethyl)phenyl]furfural, 2-chloro-5-phenylpyridine-3-carboxaldehyde, 6-(4-chlorophenyl)-2-pyridinecarboxaldehyde, 6-(4-fluorophenyl)-2-pyridinecarboxaldehyde, 5-[3-(trifluoromethyl)phenyl]furfural, 6-(3-nitrophenyl)-2-pyridinecarboxaldehyde, 5-(3-chloro-4-methoxyphenyl)furfural, 4-(2-pyridyl)benzaldehyde, 4-(4-formylphenyl)pyridine, 4-(pyridin-3-yl)benzaldehyde, *p*-formylbenzoic acid N-hydroxysuccinimide ester, 2-methoxy-1-naphthaldehyde, 4-methoxy-1-naphthaldehyde, 2-methyl-1-naphthaldehyde, 6-methoxy-2-naphthaldehyde, 6-ethyl-3-formylchromone, 2-formylphenylboronic acid MIDA ester, 3-formylphenylboronic acid MIDA ester, 4-formylphenylboronic acid MIDA ester, 1-(4-methoxyphenyl)-5-methyl-1h-pyrazole-4-carboxaldehyde, 4-antipyrinecarboxaldehyde, 4-(3-hydroxy-3-methylbut-1-yn-1-yl)benzaldehyde, 4-acetoxy-3-methoxycinnamaldehyde, 6-isopropylindole-3-carboxaldehyde, 6-isopropylindole-3-carboxaldehyde, 4-(1-piperidinyl)benzaldehyde, 2-(*boc*-amino)benzaldehyde, 4-(*boc*-amino)benzaldehyde, pentamethylbenzaldehyde, 3-(diethoxymethyl)benzaldehyde, 4-(diethoxymethyl)benzaldehyde, 2-butoxy-3-formyl-5-methylphenylboronic acid, 4-[3-(dimethylamino)propoxy]benzaldehyde, N-*boc*-4-piperidineacetaldehyde, dodecyl, aldehyde name, 4'-chloro-3'-fluoro[1,1'-biphenyl]-2-carbaldehyde, 3',4'-dichloro[1,1'-biphenyl]-2-carbaldehyde, 3-(3,4-dichlorophenoxy)benzaldehyde, 3-(3,5-dichlorophenoxy)benzaldehyde, 4-(2,4-dichlorophenoxy)benzaldehyde, 4-(6-formylpyridin-2-yl)benzotrile, 3-(6-formylpyridin-2-yl)benzotrile, dibenzofuran-4-carboxaldehyde, 4-(4-bromophenoxy)benzaldehyde, 2'-chloro-biphenyl-2-carbaldehyde, 3-(4-chlorophenyl)benzaldehyde, 4'-chloro-biphenyl-4-carbaldehyde, 2-(4-chlorophenoxy)benzaldehyde, 3-(4-chlorophenoxy)benzaldehyde, 4-(3-chlorophenoxy)benzaldehyde, 4-(4-chlorophenoxy)benzaldehyde, 2-(4-fluorophenyl)benzaldehyde, 2-fluorobiphenyl-4-carboxaldehyde, 4-(4-fluorophenoxy)benzaldehyde, 4-fluoro-3-phenoxybenzaldehyde, 4-(4-nitrophenoxy)benzaldehyde, 1H-benzo[*g*]indole-3-carboxaldehyde, 5-acenaphthenecarboxaldehyde, biphenyl-2-carboxaldehyde, biphenyl-3-carboxaldehyde, biphenyl-4-

carboxaldehyde, 3-phenoxybenzaldehyde, 4-phenoxybenzaldehyde, 2-(4-formylphenyl)-6-(hydroxymethyl)pyridine, 6-(4-methoxyphenyl)-2-pyridinecarboxaldehyde, 6-[4-(methylsulfonyl)phenyl]-2-pyridinecarboxaldehyde, 2,3-dimethoxy-1-naphthaldehyde, 3,8-dimethoxy-2-naphthaldehyde, 4,7-dimethoxy-1-naphthaldehyde, 4-dimethylamino-1-naphthaldehyde, 1-boc-7-azaindole-3-carboxaldehyde, 3-(1-Methyl-1H-indol-3-yl)butyraldehyde, 2,6-difluoro-4-formylphenylboronic acid, 2-fluoro-5-formylphenylboronic acid pinacol ester, 2-(1,3,3-trimethylindolin-2-ylidene)acetaldehyde, 2,3,6,7-tetrahydro-8-hydroxy-1h,5h-benzo[ij]quinolizine-9-carboxaldehyde, 2-methyl-N-ethyl-n-(2-cyanoethyl)-4-aminobenzaldehyde, 2-cyclohexylbenzaldehyde, N-benzylpiperidine-4-carboxaldehyde, *trans*-4-(diethylamino)cinnamaldehyde, 2-methyl-3-phenylpropanal, 3-(4-*tert*-butylphenyl)propanal, 2-(hexyloxy)benzaldehyde, 4-(hexyloxy)benzaldehyde, 4-(4-hydroxy-4-methylpentyl)-3-cyclohexene-1-carboxaldehyde, tridecanal, 3-formylphenyl 2,4-dichlorobenzoate, 3-formylphenyl 2-chlorobenzoate, 3-formylphenyl 4-chlorobenzoate, 2'-trifluoromethyl-biphenyl-4-carbaldehyde, 2-[4-(trifluoromethyl)phenyl]benzaldehyde, 3'-(trifluoromethyl)-1,1'-biphenyl-2-carboxaldehyde, 3-[3-(trifluoromethyl)phenoxy]benzaldehyde, 4-(4-formylphenoxy)benzonitrile, fluorene-2-carboxaldehyde, 4-(4-bromobenzyloxy)benzaldehyde, methyl 3-(6-formyl-2-pyridinyl)benzoate, methyl 4-(6-formylpyridin-2-yl)benzoate, 3-(4-methylphenyl)benzaldehyde, 4-(4-methylphenyl)benzaldehyde, diphenylacetaldehyde, 2'-methoxy-biphenyl-2-carbaldehyde, 2-benzyloxybenzaldehyde, 3-benzyloxybenzaldehyde, 4-benzyloxybenzaldehyde, 3-(4-methylphenoxy)benzaldehyde, 4-(4-methylphenoxy)benzaldehyde, 2-(3-methoxyphenoxy)benzaldehyde, 2-(4-methoxyphenoxy)benzaldehyde, 3-(4-methoxyphenoxy)benzaldehyde, 4-(4-methoxyphenoxy)benzaldehyde, 4-(benzyloxy)-2-hydroxybenzaldehyde, 2-[(phenylsulfonyl)methyl]benzaldehyde, N-boc-indoline-7-carboxaldehyde,  $\alpha$ -amylcinnamaldehyde, N-Boc-phenylalaninal, 2-(4-*tert*-butylbenzyl)propionaldehyde, 4-(heptyloxy)benzaldehyde, 3-isobutylaziridine-2-carboxaldehyde, 4-[3,5-bis(trifluoromethyl)phenyl]benzaldehyde, 9-anthracenecarboxaldehyde, 10-chloro-9-anthraldehyde, 9-phenanthrenecarboxaldehyde, phenanthrene-4-carbaldehyde, 3-(2-furoyl)quinoline-2-carboxaldehyde, *trans*-4-stilbenecarboxaldehyde, 4'-bromostilbene-4-carboxaldehyde, 2-methyl-9-acridinecarboxaldehyde, 2-phenylindole-3-carboxaldehyde,  $\beta$ -phenylcinnamaldehyde, methyl 4-(3-formylphenyl)benzoate, methyl 4-(4-formylphenyl)benzoate, 9-ethyl-3-carbazolecarboxaldehyde, 2-benzyloxy-3-methoxybenzaldehyde, 3-benzyloxy-4-methoxybenzaldehyde, 4-benzyloxy-3-methoxybenzaldehyde, [3aR(3 $\alpha$ ,4 $\alpha$ ,5 $\beta$ ,6 $\alpha$ )](-)-5-(benzoyloxy)hexahydro-2-oxo-2H-cyclopenta[b]furan-4-carboxaldehyde, 4-[bis[2-(acetyloxy)ethyl]amino]benzaldehyde,  $\alpha$ -hexylcinnamaldehyde, 4'-formylbenzo-15-crown-5, 3,5-di-*tert*-butylbenzaldehyde, 3,5-di-*tert*-butyl-2-hydroxybenzaldehyde, 3,5-di-*tert*-butyl-4-hydroxybenzaldehyde, 4-octylbenzaldehyde, 4-(dibutylamino)benzaldehyde, farnesal, oncrasin-1, 1-benzylindole-3-carboxaldehyde, 5-benzyloxyindole-3-carboxaldehyde, 1,3-diphenyl-1h-pyrazole-4-carboxaldehyde, 10-methylanthracene-9-carboxaldehyde, 4-benzyloxy-3,5-dimethylbenzaldehyde, 1-boc-4-(4-formylphenyl)piperazine, 1-boc-4-(2-formylphenyl)piperazine, 3,5-di-*tert*-butyl-2-methoxybenzaldehyde, *cis*-11-hexadecenal, 1-pyrenecarboxaldehyde, 3-(4-*tert*-butylphenoxy)benzaldehyde, 4-(decyloxy)benzaldehyde, 3-(1-methylindol-3-yl)-3-phenylpropionaldehyde, 4-(diphenylamino)benzaldehyde, 2-(diphenylphosphino)benzaldehyde, 3-

(3',5'-di-*tert*-butyl-4'-hydroxy)phenyl-2,2-dimethylpropanal, 3,5-dibenzyloxybenzaldehyde, 3,4-dibenzyloxybenzaldehyde.

## S2. Full list of enzymes and the best inhibitors

**Table S1.** The full list of enzymes with preferred P1' substituents that were the most favored, had the best interaction with the catalytic metal ion via the phosphinate group, and were the most specific. The stereochemistry of the ligands and the calculated Gibbs free energy of binding in the active center are included. Known inhibitors are given as the references, with inhibition potency ( $K_i$  or IC50) and calculated  $\Delta G$  values.

| Enzyme                                             | Inhibitor                              | P1' substituent                            | Configuration | $\Delta G$<br>[kJ/mol] |
|----------------------------------------------------|----------------------------------------|--------------------------------------------|---------------|------------------------|
| M01.001<br><i>Homo sapiens</i><br>4FYT             | The best found                         | 4-Hydroxy-3-methoxyphenyl                  | S,S           | -53.82                 |
|                                                    | Metal-interacting                      |                                            |               |                        |
|                                                    | The most specific                      | 5-Amino-thiophen-2-yl                      | R,S           | -34.19                 |
|                                                    | Known, $K_i = 0.69$ nM                 | R = 4-(Aminomethyl)phenyl [1]              |               | -64.11                 |
| M01.001<br><i>Sus scrofa</i><br>4FKE               | The best found                         | 4-Boronophenyl MIDA ester                  | R,R           | -39.09                 |
|                                                    | Metal-interacting                      |                                            |               |                        |
|                                                    | The most specific                      | Bestatin [2]                               |               | -45.38                 |
|                                                    | Known, IC <sub>50</sub> = 8.10 $\mu$ M |                                            |               |                        |
| M01.003<br><i>Homo sapiens</i><br>4KX7             | The best found                         | 3-Isobutylaziridin-2-yl                    | R,S           | -38.80                 |
|                                                    | Metal-interacting                      |                                            |               |                        |
|                                                    | The most specific                      | 1-Methyl-1H-imidazol-5-yl                  | R,S           | -26.34                 |
|                                                    | Known, $K_i = 75$ $\mu$ M              | Bestatin [3]                               |               | -7.54                  |
| M01.004<br><i>Homo sapiens</i><br>4MKT             | The best found                         | 2-Borono-5-methoxyphenyl                   | R,S           | -57.39                 |
|                                                    | Metal-interacting                      | none                                       |               |                        |
|                                                    | The most specific                      | 2-Butyl-5-chloro-1H-imidazol-4-yl          | R,S           | -40.94                 |
|                                                    | Known, $K_i = 200$ nM                  | Bestatin [4]                               |               | -53.73                 |
| M01.005<br><i>Escherichia coli</i><br>3B34         | The best found                         | 3,4-Dihydroxyphenyl                        | R,E           | -49.91                 |
|                                                    | Metal-interacting                      |                                            |               |                        |
|                                                    | The most specific                      | none                                       |               |                        |
|                                                    | Known, $K_i = 1.5$ nM                  | Ala-P[(O)(OH)CH <sub>2</sub> ]-Phe-Phe [5] |               | -50.47                 |
| M01.011<br><i>Homo sapiens</i><br>5MJ6             | The best found                         | 3-(Furan-2-carbonyl)quinolin-2-yl          | R,S           | -117.58                |
|                                                    | Metal-interacting                      |                                            |               |                        |
|                                                    | The most specific                      | none                                       |               |                        |
|                                                    | Known, $K_i = 1.7$ nM                  | IVDE77 [6]                                 |               | -53.58                 |
| M01.021<br><i>Thermoplasma acidophilum</i><br>1Z5H | The best found                         | 4-(6-(Hydroxymethyl)pyridin-2-yl)phenyl    | R,S           | -37.43                 |
|                                                    | Metal-interacting                      | 6-Ethyl-4-oxo-4H-chromen-3-yl              | R,S           | -37.15                 |
|                                                    | The most specific                      |                                            |               | -37.15                 |
|                                                    | Unknown                                | Bestatin                                   |               | -6.42                  |
| M01.024                                            | The best found                         | 2-Benzyloxyphenyl                          | R,S           | -76.49                 |

|                         |                                              |                                   |     |         |
|-------------------------|----------------------------------------------|-----------------------------------|-----|---------|
| <i>Homo sapiens</i>     | Metal-interacting                            | Phenanthren-4-yl                  | R,Z | -36.15  |
| 5AB0                    | The most specific                            | Diphenylmethyl                    | R,Z | -52.41  |
|                         | Known, IC <sub>50</sub> = 237 nM             | DABA-Trp derivative [7]           |     | -54.74  |
| M01.029                 | The best found                               | 3-Hydroxy-4-methoxyphenyl         | R,S | -63.40  |
| <i>Plasmodium</i>       | Metal-interacting                            |                                   |     |         |
| <i>falciparum</i>       | The most specific                            | 4-(2-Pyridyl)phenyl               | R,E | -63.35- |
| 3EBH                    | Known, IC <sub>50</sub> = 6 nM               | BDM14471 [8]                      |     | -37.38  |
| M01.031                 | The best found                               |                                   |     |         |
| <i>Colwellia</i>        | Metal-interacting                            | 2-( <i>tert</i> -Butylthio)phenyl | R,R | -76.28  |
| <i>psychrerythraea</i>  | The most specific                            |                                   |     |         |
| 3CIA                    | Unknown value                                | Bestatin                          |     | -66.93  |
| M01.034                 | The best found                               |                                   |     |         |
| <i>Saccharomyces</i>    | Metal-interacting                            | 3,5-Di- <i>tert</i> -butylphenyl  | S,R | -53.62  |
| <i>cerevisiae</i>       | The most specific                            | 3-phenyl-1H-pyrazol-4-yl          | R,R | -44.73  |
| 2XQ0                    | Unknown                                      | Bestatin                          |     | -47.06  |
| M01.un                  | The best found                               |                                   |     |         |
| <i>Neisseria</i>        | Metal-interacting                            | Quinolin-4-yl                     | R,E | -54.98  |
| <i>meningitides</i>     | The most specific                            | Biphenyl-2-yl                     | R,E | -45.78  |
| 2GTQ                    | Known, K <sub>i</sub> = 54 nM                | R = 4-Hydroxyphenyl [9]           |     | -26.61  |
| M17.001                 | The best found                               | 3-(4-Chlorophenyl)phenyl          |     | -90.35  |
| <i>Bos taurus</i>       | Metal-interacting                            |                                   |     |         |
| 1LAM                    | The most specific                            | 4,6-Dichloro-2H-chromen-3-yl      |     | -82.09  |
|                         | Known, K <sub>i</sub> = 22 nM                | L-leucinthiol [10]                |     | -40.78  |
| M17.002                 | The best found                               | 4-Borono-3-fluorophenyl           | R,R |         |
| <i>Solanum</i>          | Metal-interacting                            | 3-Boronophenyl                    | R,S |         |
| <i>lycopersicum</i>     | The most specific                            | 3-Methylbenzo[b]thiophen-2-yl     | S,S |         |
| 4KSI                    | Known, Activity = 0%<br>for 0.1 mM inhibitor | Bestatin                          |     | -39.99  |
| M17.003                 | The best found                               |                                   |     |         |
| <i>Escherichia coli</i> | Metal-interacting                            | N-phenylpiperidin-4-yl            | S,E | -86.01  |
| 1GYT                    | The most specific                            | 2,2'-Bithiophen-5-yl              | R,S | -75.42  |
|                         | Unknown                                      | Bestatin                          |     | -40.66  |
| M17.016                 | The best found                               |                                   |     |         |
| <i>Helicobacter</i>     | Metal-interacting                            | 3-Borono-6-ethoxyphenyl           | S,Z | -81.94  |
| <i>pylori</i>           | The most specific                            | None                              |     |         |
| 4ZLA                    | Known, IC <sub>50</sub> = 49 nM              | Bestatin [11]                     |     | -26.60  |
| M17.A05                 | The best found                               | 4-Borono-2-fluorophenyl           | R,R | -78.00  |
| <i>Caenorhabditis</i>   | Metal-interacting                            | 3-Borono-5-Bromo-4-methoxyphenyl  | R,Z | -68.29  |
| <i>elegans</i>          | The most specific                            | Benzofuran-2-yl                   | R,R | -66.70  |
| 2HC9                    | Unknown                                      | Bestatin                          |     | -35.60  |
| M17.uns                 | The best found                               | 6-(3-Cyanophenyl)pyridin-2-yl     | S,Z | -92.97  |

|                                   |                                         |                                                         |     |         |
|-----------------------------------|-----------------------------------------|---------------------------------------------------------|-----|---------|
| <i>Pseudomonas putida</i>         | Metal-interacting                       |                                                         |     |         |
| 3H8G                              | The most specific                       |                                                         |     |         |
|                                   | Unknown                                 | Bestatin [12]                                           |     | -37.17  |
| M17.uns                           | The best found                          | 3-Borono-5-methylphenyl                                 | S,S | -81.84  |
| <i>Xanthomonas oryzae</i>         | Metal-interacting                       | 3-Borono-2-methoxy-5-methylphenyl                       | S,S | -76.81  |
| 3JRU                              | The most specific                       | 3-(4-Fluorophenyl)propyl                                | R,S | -77.93  |
|                                   | Unknown                                 | Bestatin                                                |     | -46.58  |
|                                   | The best found                          | 4-(4-cyanophenoxy)phenyl                                | R,R | -78.72  |
| M18.002                           | Metal-interacting                       | 1-(4-fluorophenyl)-5-methyl-1H-pyrazol-4-yl             | R,S | -74.22  |
| <i>Bos Taurus</i>                 | The most specific                       | 4-(4-cyanophenoxy)phenyl                                | R,R | -78.72  |
| 3VAT                              | Known,                                  | Phenantroline [13]                                      |     | -28.47  |
|                                   | The best found                          | 3,4-Dibenzoyloxyphenyl                                  | R,S | -88.05  |
| M18.002                           | The most specific                       | None                                                    |     |         |
| <i>Homo sapiens</i>               | Metal-interacting                       | 5-(Ethoxymethyl)furan-2-yl                              | S,S | -46.49  |
| 4DYO                              | Known,<br>C = 50 µg/ml – 50%            | Phenantroline [13]                                      |     | -16.74  |
| M18.002                           | The best found                          | Imidazo-2-yl                                            | S,E | -67.88  |
| <i>Pseudomonas aeruginosa</i>     | Metal-interacting                       |                                                         |     |         |
| 4NJR                              | The most specific                       | Ethyl                                                   | S,R | -37.17  |
|                                   | Known                                   | Phenantroline [13]                                      |     | -16.83  |
| M18.003                           | The best found                          | 3,5-Dihydroxyphenyl                                     | R,S | -80.32  |
| <i>Plasmodium falciparum</i>      | Metal-interacting                       |                                                         |     |         |
| 4EME                              | The most specific                       | 3-Cyano-4-fluorophenyl                                  | S,S | -60.49  |
|                                   | Known, $K_i = 0.34 \mu\text{M}$         | (R)-Glu $\alpha$ -phosphonic amino acid derivative [14] |     | -29.94  |
| M18.004                           | The best found                          | Acenaphthen-5-yl                                        | R,R | -117.11 |
| <i>Clostridium acetobutylicum</i> | Metal-interacting                       |                                                         |     |         |
| 2GLJ                              | The most specific                       | 8-Hydroxyquinolin-yl                                    | R,E | -111.17 |
|                                   | Unknown                                 | Bestatin                                                |     | -88.90  |
| M18.004                           | The best found                          |                                                         |     |         |
| <i>Thermotoga maritima</i>        | Metal-interacting                       | 3,4-Dichlorophenyl                                      | R,R | -63.23  |
| 2GLF                              | The most specific                       |                                                         |     |         |
|                                   | Unknown                                 | Bestatin                                                |     | -31.90  |
| M24.001                           | The best found                          | 3-Isobutylaziridin-2-yl                                 | S,R | -65.96  |
| <i>Escherichia coli</i>           | Metal-interacting                       |                                                         |     |         |
| 2GGC                              | The most specific                       | 4-(1H-Imidazol-1-yl)phenyl                              | R,R | -41.39  |
|                                   | Known, $\text{IC}_{50} = 67 \text{ nM}$ | Inhibitor 2 [15]                                        |     | -28.38  |
| M24.001                           | The best found                          | 3-Borono-6-ethoxyphenyl                                 | R,R | -50.98  |
| <i>Mycobacterium tuberculosis</i> | Metal-interacting                       |                                                         |     |         |
|                                   | The most specific                       | 3-Borono-4-methoxy-5-Bromophenyl                        | R,E | -28.25  |

|                         |                                   |                                               |       |         |
|-------------------------|-----------------------------------|-----------------------------------------------|-------|---------|
| 1YJ3                    | Unknown value                     | Inhibitor 2 [15]                              |       | -46.56  |
| M24.001                 | The best found                    | Isoquinolin-5-yl                              | R,E   | -77.66  |
| <i>Rickettsia</i>       | Metal-interacting                 | Dimethylpropyl                                | S,R   | -75.66  |
| <i>prowazekii</i>       | The most specific                 | Isoquinolin-5-yl                              | R,E   | -77.66  |
| 3MX6                    | Known, IC <sub>50</sub> = 0.6 μM  | Furoic acid derivative (6) [16]               |       | -42.62  |
| M24.002                 | The best found                    | 4-Borono-2,3-difluorophenyl                   | R,S   | -84.15  |
| M24.002                 | The most specific                 | 3-(3-Chlorophenyl)propyl                      | S,S   | -55.00  |
| <i>Homo sapiens</i>     | Metal-interacting                 | Phenylethyl                                   | S,S   | -59.33  |
| 1B6A                    | Known, K <sub>i</sub> = 26 nM     | Beloranib [17]                                |       | -28.39  |
| M24.017                 | The best found                    | 4-Boronophenyl                                | R,E   | -85.18  |
| M24.017                 | The most specific                 | 4-Borono-3-fluorophenyl                       | R,R   | -51.19  |
| <i>Homo sapiens</i>     | Metal-interacting                 | 4-(6-(hydroxymethyl)pyridinyl)phenyl          | S,R   | -77.96  |
| 2GZ5                    | Known, K <sub>i</sub> = 10 nM     | Barbiturate-based inhibitor (10)[18]          |       | -53.46  |
| M24.035                 | The best found                    |                                               |       |         |
| <i>Pyrococcus</i>       | Metal-interacting                 | 2-Bromo-3-pyridinecarboxaldehyde              | R,S   | -66.07  |
| <i>furius</i>           | The most specific                 |                                               |       |         |
| 1XGS                    | Known, K <sub>i</sub> = 2 μM      | Bestatin-like inhibitor (A311263) [19]        |       | -32.44  |
| M24.036                 | The best found                    |                                               |       |         |
| M24.036                 | Metal-interacting                 | Benzo[1,3]dioxol-5-yl                         | R,R   | -93.88  |
| <i>Staphylococcus</i>   | The most specific                 | 2-Methylindol-7-yl                            | R,S   | -59.33  |
| <i>aureus</i>           | Known, IC <sub>50</sub> = 7 μM    | 3-Amino-1-(cyclopropylamino)heptan-2-one [20] |       | -34.55  |
| 1QXY                    | The best found                    | 2-Methyl-3-phenylpropyl                       | S,S,R | -106.79 |
| M24A.uns                | Metal-interacting                 |                                               |       |         |
| <i>Encephalitozoon</i>  | The most specific                 | 1-(Benzyloxy)ethyl                            | S,R,S | -103.11 |
| <i>cuniculi</i>         | Known, IC <sub>50</sub> = 95.0 nM | TNP-470 [21]                                  |       | -61.73  |
| 3FM3                    | The best found                    | bicyclo[2.2.1]heptan-2-yl                     | S,S   | -80.36  |
| M24.004                 | Metal-interacting                 | 6-Methoxyindan-5-yl                           | S,Z   | -57.65  |
| <i>Escherichia coli</i> | The most specific                 | (2-(Benzyloxycarbonyl)amino)ethyl             | S,R   | -57.93  |
| 1WL9                    | Known, K <sub>i</sub> = 14 μM     | Apstatin [22]                                 |       | -44.43  |
| M24.009                 | The best found                    | 4-Borono-2-fluorophenyl                       | R,R   | -51.91  |
| M24.009                 | The most specific                 | 2-Boronophenyl                                | S,S   | -41.61  |
| <i>Homo sapiens</i>     | Metal-interacting                 | None                                          |       |         |
| 3CTZ                    | Known, K <sub>i</sub> = 260 nM    | GW796406 <sup>1</sup> [23]                    |       | -42.11  |
| M24.026                 | The best found                    | 3-Phenylaziridin-2-yl                         | R,S   | -102.22 |
| M24.026                 | The most specific                 | 2-Borono-6-fluorophenyl                       | R,R   | -68.93  |
| <i>Homo sapiens</i>     | Metal-interacting                 | 3-Borono-5-isopropoxyphenyl                   | R,R   | -83.35  |
| 5X49                    | Known, K <sub>i</sub> = 640 nM    | Apstatin [22]                                 |       | -103.24 |
| M24.031                 | The best found                    |                                               |       |         |
| <i>Thermotoga</i>       | Metal-interacting                 | 4-Bromophenyl                                 | R,E   | -67.12  |
| <i>maritima</i>         | The most specific                 |                                               |       |         |

|                                   |                                 |                                        |     |        |
|-----------------------------------|---------------------------------|----------------------------------------|-----|--------|
| 2ZSG                              | Unknown                         | Bestatin                               |     | -37.08 |
| M24.038                           | The best found                  | 4-(Pyridin-3-yl)phenyl                 | S,R | -83.36 |
| <i>Plasmodium falciparum</i>      | Metal-interacting               | 1,3-Diphenyl-1H-pyrazol-4-yl           | S,E | -67.21 |
|                                   | The most specific               |                                        |     |        |
| 5JR6                              | Known, $K_i = 20.2 \mu\text{M}$ | Apstatin [24]                          |     | -47.01 |
| M24.A11                           | The best found                  | 2-(Carboxymethoxy)-5-chlorophenyl      | S,S | -91.54 |
| <i>Xanthomonas campestris</i>     | Metal-interacting               |                                        |     |        |
|                                   | The most specific               | 5-(Ethoxycarbonyl)-1H-pyrrol-3-yl      | R,R | -60.77 |
| 5CDE                              | Unknown                         | Bestatin                               |     | -18.85 |
| M28.003                           | The best found                  | 1H-Indazol-6-yl                        | R,S | -72.68 |
| <i>Streptomyces griseus</i>       | Metal-interacting               |                                        |     |        |
|                                   | The most specific               | 2-Hydroxy-5-methoxyphenyl              | R,R | -56.82 |
| 1CP7                              | Unknown                         | Phenantroline [25]                     |     | -33.12 |
| M28.uns                           | The best found                  | 3,4-Dihydroxyphenyl                    | R,S | -74.32 |
| <i>Clostridium acetobutylicum</i> | Metal-interacting               |                                        |     |        |
|                                   | The most specific               | 2,4-Dichloro-6-hydroxyphenyl           | R,R | -73.68 |
| 3K9T                              | Unknown                         | Phenantroline                          |     | -12.89 |
| M28.uns                           | The best found                  | 2,3,4-Trihydroxyphenyl                 | S,Z | -63.56 |
| <i>Parabacteroides distasonis</i> | Metal-interacting               | None                                   |     |        |
|                                   | The most specific               | 6-Hydroxychromen-3-yl                  | S,R | -37.56 |
| 3TC8                              | Unknown value                   | Phenantroline                          |     | -34.67 |
| M28.002                           | The best found                  | 3-Methylpyridin-2-yl                   | R,R | -98.84 |
| <i>Vibrio proteolyticus</i>       | Metal-interacting               | 2-Ethylpropyl                          | S,S | -74.28 |
|                                   | The most specific               | 6-Methylpyridin-2-yl                   | S,R | -92.41 |
| 1RTQ                              | Known, $K_i = 18 \text{ nM}$    | Bestatin [26]                          |     | -71.01 |
| M28.020                           | The best found                  | 6-Methyl-4-oxo-4H-chromen-3-yl         | S,S | -54.56 |
| <i>Aneurinibacillus sp. AM-1</i>  | Metal-interacting               |                                        |     |        |
|                                   | The most specific               |                                        |     |        |
| 2EK8                              | Unknown                         | Bestatin                               |     | -59.12 |
| M29.001                           | The best found                  | 3-Borono-5-isopropoxyphenyl            | S,Z | -64.62 |
| <i>Thermus thermophiles</i>       | Metal-interacting               | 2,3-Dihydrobenzofuran-5-yl             | R,E | -59.81 |
|                                   | The most specific               |                                        |     |        |
| 2AYI                              | Unknown                         | Bestatin                               |     | -40.69 |
| M29.005                           | The best found                  | 5-Chlorofuran-2yl                      | R,R | -72.55 |
| <i>Staphylococcus aureus</i>      | Metal-interacting               |                                        |     |        |
|                                   | The most specific               | 2-Bromophenyl                          | R,R | -55.22 |
| 1ZJC                              | Unknown value                   | Bestatin                               |     | -44.63 |
| M42.001                           | The best found                  | 4-[N,N-Bis(2-hydroxyethyl)amino]phenyl | S,Z | -50.59 |
| <i>Bacillus subtilis</i>          | Metal-interacting               | None                                   |     |        |
| 1VHE                              | The most specific               | None                                   |     |        |

|                                 |                       |                                     |     |        |
|---------------------------------|-----------------------|-------------------------------------|-----|--------|
|                                 | Unknown value         | Bestatin                            |     | -15.31 |
| M42.001                         | The best found        | 2-Chloro-5-phenylpyridin-3-yl       | R,Z | -67.27 |
| <i>Streptococcus pneumoniae</i> | Metal-interacting     |                                     |     |        |
| 3KL9                            | The most specific     | 4-(Difluoromethoxy)-3-hydroxyphenyl | R,S | -56.17 |
|                                 | Known, $K_i = 292$ nM | Bestatin <sup>5</sup> [27]          |     | -41.97 |
| M42.003                         | The best found        | 3,4-Dibenzyloxyphenyl               | S,S | -71.91 |
| <i>Pyrococcus horikoshii</i>    | Metal-interacting     |                                     |     |        |
| 2CF4                            | The most specific     | 4-(Dimethylamino)phenyl             | R,E | -40.93 |
|                                 | Unknown value         | Bestatin                            |     | -35.03 |
| M42.004                         | The best found        | 2,3-Dimethoxynaphtha-1-yl           | R,Z | -58.55 |
| <i>Pyrococcus horikoshii</i>    | Metal-interacting     |                                     |     |        |
| 1Y0Y                            | The most specific     | 4-(4-Methylphenoxy)phenyl           | R,Z | -50.41 |
|                                 | Unknown value         | Bestatin                            |     | -27.75 |
| M42.009                         | The best found        | 3-Iodo-4-hydroxy-5-methoxyphenyl    | S,R | -51.41 |
| <i>Pyrococcus horikoshii</i>    | Metal-interacting     |                                     |     |        |
| 2VPU                            | The most specific     |                                     |     | -42.42 |
|                                 | Unknown value         | Bestatin                            |     | -42.42 |
| M55.001                         | The best found        | Indol-4-yl                          | S,R | -86.11 |
| <i>Bacillus subtilis</i>        | Metal-interacting     |                                     |     |        |
| 1HI9                            | The most specific     | Biphen-3-yl                         | S,Z | -68.89 |
|                                 | Unknown value         | Bestatin                            |     | -55.27 |

### S3. ADMET properties of the best selected inhibitors from the Table S1.

**Table S2.** Selected ADMET properties for the best inhibitors: MW – molecular weight, H-acc – H-bond acceptor number, H-don – H-bond donor number, LogP – logarithm of partition coefficient, GI – gastrointestinal absorption, Lipinski – if the compound does not fulfill basics of the rule of five the outside value is mentioned.

| P1' group                         | MW     | H-acc | H-don | LogP  | Water solubility   | GI   | Lipinski |
|-----------------------------------|--------|-------|-------|-------|--------------------|------|----------|
| 4-Hydroxy-3-methoxyphenyl         | 406.39 | 6     | 2     | 0.5   | Moderately soluble | Low  | Yes      |
| 5-Amino-thiophen-2-yl             | 381.41 | 4     | 2     | 0.16  | Soluble            | Low  | Yes      |
| 4-Boronophenyl MIDA ester         | 515.28 | 8     | 1     | -1.61 | Moderately soluble | Low  | 1 (MW)   |
| 3-Isobutylaziridin-2-yl           | 368.41 | 4     | 2     | -1.13 | Soluble            | High | Yes      |
| 1-Methyl-1H-imidazol-5-yl         | 365.36 | 4     | 2     | -0.64 | Soluble            | High | Yes      |
| 2-Borono-5-methoxyphenyl          | 434.21 | 7     | 3     | -1.07 | Soluble            | Low  | Yes      |
| 2-Butyl-5-chloro-1H-imidazol-4-yl | 440.88 | 5     | 2     | 1.19  | Poorly soluble     | Low  | Yes      |
| 3,4-Dihydroxyphenyl               | 390.35 | 6     | 3     | 0.12  | Soluble            | Low  | Yes      |



|                                         |        |   |   |      |                    |      |        |
|-----------------------------------------|--------|---|---|------|--------------------|------|--------|
| 3-(Furan-2-carbonyl)quinolin-2-yl       | 505.48 | 7 | 1 | 1.62 | Poorly soluble     | Low  | 1 (MW) |
| 4-(6-(Hydroxymethyl)pyridin-2-yl)phenyl | 467.47 | 6 | 2 | 1.02 | Poorly soluble     | Low  | Yes    |
| 6-Ethyl-4-oxo-4H-chromen-3-yl           | 456.45 | 6 | 1 | 1.33 | Poorly soluble     | Low  | Yes    |
| 2-Benzoyloxyphenyl                      | 466.49 | 5 | 1 | 2.1  | Poorly soluble     | High | Yes    |
| Diphenylmethyl                          | 448.47 | 4 | 1 | 2.34 | Poorly soluble     | High | Yes    |
| Phenanthren-4-yl                        | 458.47 | 4 | 1 | 2.67 | Poorly soluble     | High | Yes    |
| 3-Hydroxy-4-methoxyphenyl               | 406.39 | 6 | 2 | 0.38 | Moderately soluble | Low  | Yes    |
| 4-(2-Pyridyl)benzaldehyde               | 435.43 | 5 | 1 | 1.38 | Poorly soluble     | High | Yes    |
| 2-( <i>tert</i> -Butylthio)phenyl       | 448.54 | 4 | 1 | 2.09 | Poorly soluble     | Low  | Yes    |
| 3,5-Di- <i>tert</i> -butylphenyl        | 472.58 | 4 | 1 | 3.28 | Poorly soluble     | High | Yes    |
| 3-Phenyl-1H-pyrazol-4-yl                | 426.43 | 5 | 2 | 0.77 | Poorly soluble     | Low  | Yes    |
| Quinolin-4-yl                           | 409.39 | 5 | 1 | 1.04 | Moderately soluble | High | Yes    |
| Biphenyl-2-yl                           | 434.44 | 4 | 1 | 2.27 | Poorly soluble     | High | Yes    |
| 3-(4-Chlorophenyl)phenyl                | 471.91 | 5 | 3 | 3.82 | Poorly soluble     | Low  | Yes    |
| 4,6-Dichloro-2H-chromen-3-yl            | 484.31 | 6 | 3 | 3.02 | Poorly soluble     | Low  | Yes    |
| 4-Borono-3-fluorophenyl                 | 423.18 | 8 | 5 | 0.33 | Moderately soluble | Low  | Yes    |
| 3-Boronophenyl                          | 405.19 | 7 | 5 | 0.03 | Soluble            | Low  | Yes    |
| 3-Methylbenzo[b]thiophen-2-yl           | 431.48 | 5 | 3 | 3.2  | Poorly soluble     | Low  | Yes    |
| N-phenylpiperidin-4-yl                  | 442.49 | 5 | 3 | 2.41 | Moderately soluble | High | Yes    |
| 2,2'-Bithiophen-5-yl                    | 449.52 | 5 | 3 | 3.24 | Poorly soluble     | Low  | Yes    |
| 3-Borono-6-ethoxyphenyl                 | 447.23 | 8 | 5 | 0.24 | Moderately soluble | Low  | Yes    |
| 4-Borono-2-fluorophenyl                 | 423.18 | 8 | 5 | 0.33 | Moderately soluble | Low  | Yes    |
| 3-Borono-5-Bromo-4-methoxyphenyl        | 512.1  | 8 | 5 | 0.51 | Moderately soluble | Low  | 1 (MW) |
| Benzofuran-2-yl                         | 401.39 | 6 | 3 | 2.33 | Moderately soluble | High | Yes    |
| 6-(3-Cyanophenyl)pyridin-2-yl           | 460.44 | 7 | 2 | 1.63 | Poorly soluble     | Low  | Yes    |
| 3-Borono-5-methylphenyl                 | 419.22 | 7 | 5 | 0.32 | Moderately soluble | Low  | Yes    |
| 3-Borono-2-methoxy-5-methylphenyl       | 449.24 | 8 | 5 | 0.28 | Moderately soluble | Low  | Yes    |
| 3-(4-Fluorophenyl)propyl                | 407.42 | 6 | 3 | 2.98 | Poorly soluble     | High | Yes    |
| 4-(4-cyanophenoxy)phenyl                | 478.48 | 7 | 3 | 3.03 | Poorly soluble     | Low  | Yes    |

|                                             |        |   |   |       |                    |      |        |
|---------------------------------------------|--------|---|---|-------|--------------------|------|--------|
| 1-(4-fluorophenyl)-5-methyl-1H-pyrazol-4-yl | 459.45 | 7 | 3 | 2.52  | Poorly soluble     | Low  | Yes    |
| 3,4-Dibenzylloxyphenyl                      | 573.62 | 7 | 3 | 4.32  | Insoluble          | Low  | 1 (MW) |
| 5-(Ethoxymethyl)furan-2-yl                  | 409.41 | 7 | 3 | 1.56  | Moderately soluble | High | Yes    |
| Imidazo-2-yl                                | 349.32 | 6 | 4 | 0.46  | Soluble            | High | Yes    |
| Ethyl                                       | 313.33 | 5 | 3 | 1.34  | Soluble            | High | Yes    |
| 3,5-Dihydroxyphenyl                         | 393.37 | 7 | 5 | 1.1   | Soluble            | Low  | Yes    |
| 3-Cyano-4-fluorophenyl                      | 404.37 | 7 | 3 | 1.84  | Moderately soluble | Low  | Yes    |
| Acenaphthen-5-yl                            | 437.47 | 5 | 3 | 3.18  | Poorly soluble     | High | Yes    |
| 8-Hydroxyquinolin-yl                        | 428.42 | 7 | 4 | 1.64  | Moderately soluble | Low  | Yes    |
| 3,4-Dichlorophenyl                          | 430.26 | 5 | 3 | 3.06  | Poorly soluble     | High | Yes    |
| 3-Isobutylaziridin-2-yl                     | 368.41 | 6 | 4 | 0.88  | Soluble            | High | Yes    |
| 4-(1H-Imidazol-1-yl)phenyl                  | 427.43 | 6 | 3 | 1.76  | Moderately soluble | High | Yes    |
| 3-Borono-6-ethoxyphenyl                     | 449.24 | 8 | 5 | 0.27  | Moderately soluble | Low  | Yes    |
| 3-Borono-4-methoxy-5-Bromophenyl            | 512.1  | 8 | 5 | 0.51  | Moderately soluble | Low  | 1 (MW) |
| Isoquinolin-5-yl                            | 410.4  | 6 | 3 | 1.95  | Moderately soluble | High | Yes    |
| Dimethylpropyl                              | 354.4  | 4 | 1 | 1.4   | Moderately soluble | High | Yes    |
| 4-Borono-2,3-difluorophenyl                 | 441.17 | 9 | 5 | 0.63  | Moderately soluble | Low  | Yes    |
| 3-(3-Chlorophenyl)propyl                    | 422.86 | 4 | 1 | 2.04  | Poorly soluble     | High | Yes    |
| Phenylethyl                                 | 374.39 | 4 | 1 | 1.27  | Moderately soluble | High | Yes    |
| 4-Boronophenyl                              | 402.17 | 6 | 3 | -1.06 | Soluble            | Low  | Yes    |
| 4-Borono-3-fluorophenyl                     | 422.17 | 7 | 3 | -0.73 | Moderately soluble | Low  | Yes    |
| 4-(6-(hydroxymethyl)pyridinyl)phenyl        | 468.48 | 7 | 4 | 1.99  | Poorly soluble     | Low  | Yes    |
| 2-Bromo-3-pyridinecarboxaldehyde            | 441.26 | 6 | 3 | 1.76  | Moderately soluble | High | Yes    |
| Benzo[1,3]dioxol-5-yl                       | 425.46 | 7 | 3 | 1.85  | Soluble            | High | Yes    |
| 2-Methylindol-7-yl                          | 413.43 | 4 | 2 | 1.32  | Poorly soluble     | High | Yes    |

|                                   |        |   |   |      |                    |      |                |
|-----------------------------------|--------|---|---|------|--------------------|------|----------------|
| 2-Methyl-3-phenylpropyl           | 403.45 | 5 | 3 | 2.72 | Moderately soluble | High | Yes            |
| 1-(Benzyloxy)ethyl                | 419.45 | 6 | 3 | 2.24 | Moderately soluble | High | Yes            |
| bicyclo[2.2.1]heptan-2-yl         | 379.43 | 5 | 3 | 2.32 | Soluble            | High | Yes            |
| 6-Methoxyindan-5-yl               | 429.45 | 6 | 3 | 2.54 | Moderately soluble | High | Yes            |
| (2-(Benzyloxycarbonyl)amino)ethyl | 462.48 | 7 | 4 | 1.92 | Moderately soluble | Low  | Yes            |
| 4-Borono-2-fluorophenyl           | 423.18 | 8 | 5 | 0.33 | Moderately soluble | Low  | Yes            |
| 2-Boronophenyl                    | 405.19 | 7 | 5 | 0.03 | Soluble            | Low  | Yes            |
| 3-Phenylaziridin-2-yl             | 402.42 | 6 | 4 | 1.09 | Moderately soluble | High | Yes            |
| 2-Borono-6-fluorophenyl           | 423.18 | 8 | 5 | 0.33 | Moderately soluble | Low  | Yes            |
| 3-Borono-5-isopropoxyphenyl       | 463.27 | 8 | 5 | 0.52 | Moderately soluble | Low  | Yes            |
| 4-Bromophenyl                     | 440.27 | 5 | 3 | 2.73 | Moderately soluble | High | Yes            |
| 4-(Pyridin-3-yl)phenyl            | 438.46 | 6 | 3 | 2.48 | Poorly soluble     | High | Yes            |
| 1,3-Diphenyl-1H-pyrazol-4-yl      | 503.53 | 5 | 4 | 2.81 | Poorly soluble     | High | 1 (MW)         |
| 2-(Carboxymethoxy)-5-chlorophenyl | 469.85 | 8 | 4 | 1.93 | Moderately soluble | Low  | Yes            |
| 5-(Ethoxycarbonyl)-1H-pyrrol-3-yl | 422.41 | 7 | 4 | 1.41 | Moderately soluble | Low  | Yes            |
| 1H-Indazol-6-yl                   | 401.4  | 6 | 4 | 1.62 | Moderately soluble | Low  | Yes            |
| 2-Hydroxy-5-methoxyphenyl         | 407.4  | 7 | 4 | 1.35 | Moderately soluble | Low  | Yes            |
| 3,4-Dihydroxyphenyl               | 393.37 | 7 | 5 | 1.11 | Soluble            | Low  | Yes            |
| 2,4-Dichloro-6-hydroxyphenyl      | 446.26 | 6 | 4 | 2.47 | Moderately soluble | Low  | Yes            |
| 2,3,4-Trihydroxyphenyl            | 407.35 | 8 | 6 | 0.74 | Soluble            | Low  | 1 (NH or OH>5) |
| 6-Hydroxychromen-3-yl             | 431.42 | 7 | 4 | 1.73 | Moderately soluble | Low  | Yes            |
| 3-Methylpyridin-2-yl              | 376.39 | 6 | 3 | 1.5  | Moderately soluble | High | Yes            |
| 2-Ethylpropyl                     | 355.41 | 5 | 3 | 2.33 | Moderately soluble | High | Yes            |

|                                        |        |   |   |      |                    |      |                |
|----------------------------------------|--------|---|---|------|--------------------|------|----------------|
| 6-Methylpyridin-2-yl                   | 376.39 | 6 | 3 | 1.43 | Moderately soluble | High | Yes            |
| 6-Methyl-4-oxo-4H-chromen-3-yl         | 443.43 | 7 | 3 | 2.14 | Poorly soluble     | Low  | Yes            |
| 3-Borono-5-isopropoxyphenyl            | 461.25 | 8 | 5 | 0.49 | Moderately soluble | Low  | Yes            |
| 2,3-Dihydrobenzofuran-5-yl             | 401.39 | 6 | 3 | 1.93 | Moderately soluble | High | Yes            |
| 5-Chlorofuran-2-yl                     | 385.78 | 6 | 3 | 1.75 | Moderately soluble | High | Yes            |
| 2-Bromophenyl                          | 440.27 | 5 | 3 | 2.58 | Moderately soluble | High | Yes            |
| 4-[N,N-Bis(2-hydroxyethyl)amino]phenyl | 450.42 | 8 | 6 | 0.52 | Soluble            | Low  | 1 (NH or OH>5) |
| 2-Chloro-5-phenylpyridin-3-yl          | 394.79 | 6 | 3 | 1.65 | Moderately soluble | High | Yes            |
| 4-(Difluoromethoxy)-3-hydroxyphenyl    | 443.38 | 9 | 4 | 2.11 | Moderately soluble | Low  | Yes            |
| 4-(Dimethylamino)phenyl                | 402.42 | 5 | 3 | 1.86 | Moderately soluble | High | Yes            |
| 2,3-Dimethoxynaphtha-1-yl              | 469.47 | 7 | 3 | 2.77 | Poorly soluble     | Low  | Yes            |
| 4-(4-Methylphenoxy)phenyl              | 465.48 | 6 | 3 | 3.48 | Poorly soluble     | Low  | Yes            |
| Indol-7-yl                             | 400.41 | 5 | 4 | 1.96 | Moderately soluble | High | Yes            |
| 3-Iodo-4-hydroxy-5-methoxyphenyl       | 533.29 | 7 | 4 | 2.07 | Moderately soluble | Low  | 1 (MW)         |
| Indol-4-yl                             | 400.41 | 5 | 4 | 2.06 | Moderately soluble | High | Yes            |
| Biphen-3-yl                            | 435.45 | 5 | 3 | 3.29 | Poorly soluble     | High | Yes            |

**S4. Additional figures mentioned in the main text**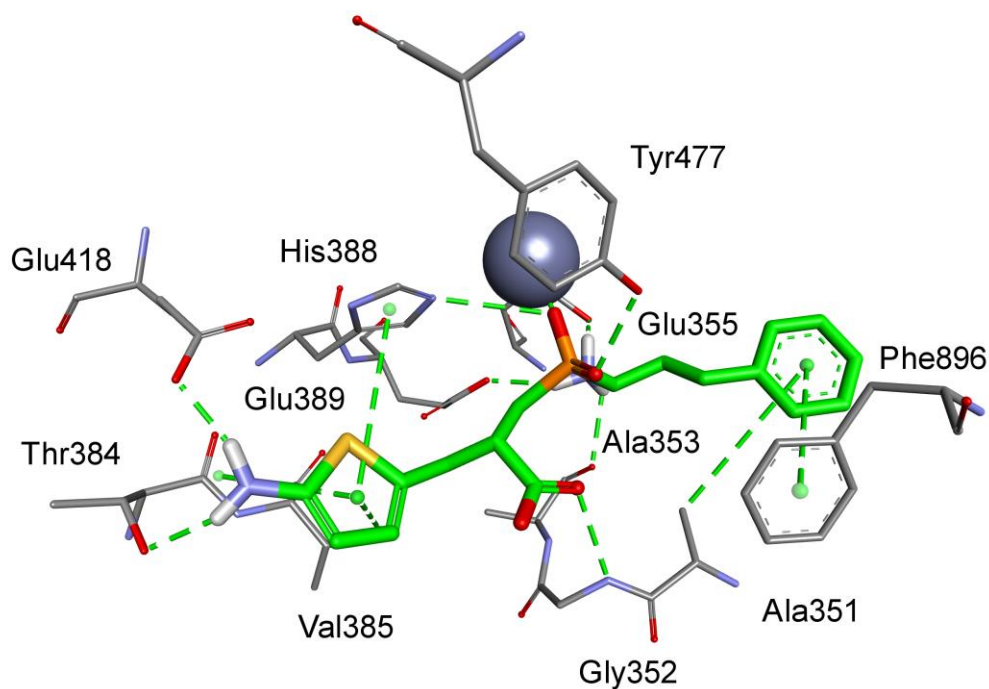

**Figure S1.** Modeled binding mode of a phosphinic dipeptide analog containing a 5-amino-thiophen-2-yl P1' fragment in the active center of human aminopeptidase N (PDB: 4FYT). Inhibitor and enzyme amino acid residues are shown as sticks, while zinc ion as a grey sphere. Hydrogen bonds and non-polar interactions are shown as thin dashed lines.

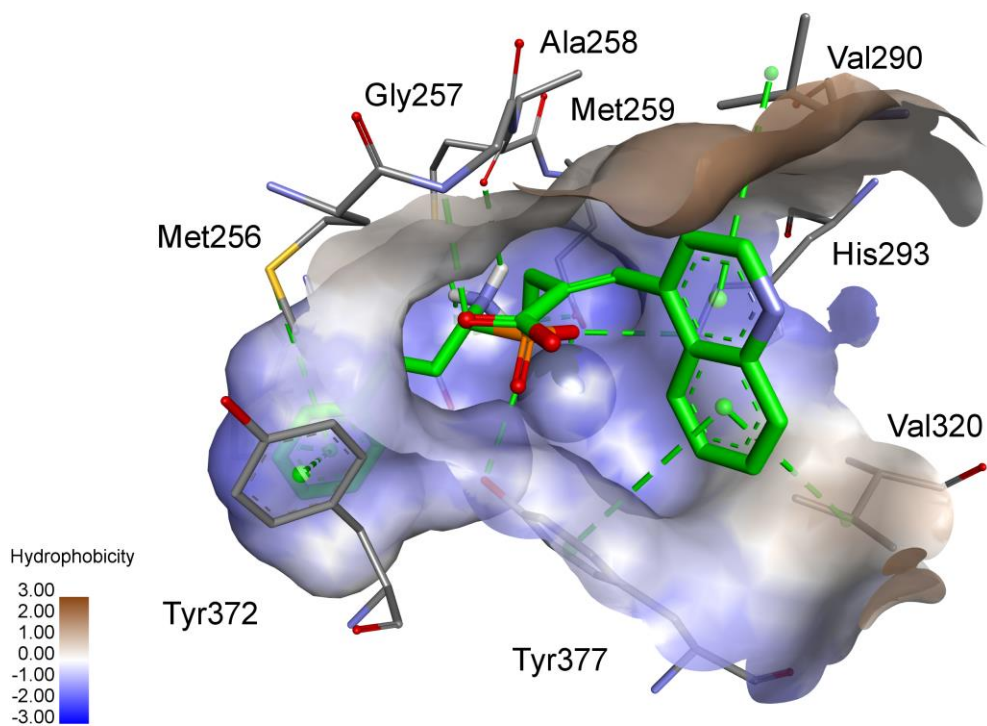

**Figure S2.** Modeled binding mode of a phosphinic dipeptide analog containing a quinolin-4-yl P1' fragment in the active center of *Neisseria meningitidis* aminopeptidase (PDB: 2GTQ). Inhibitor and enzyme amino acid residues are shown as sticks, while zinc ion as a grey sphere. Hydrogen bonds and non-polar interactions are shown as thin dashed lines. Surface represents the hydrophobicity of side chains the cavity amino acids.

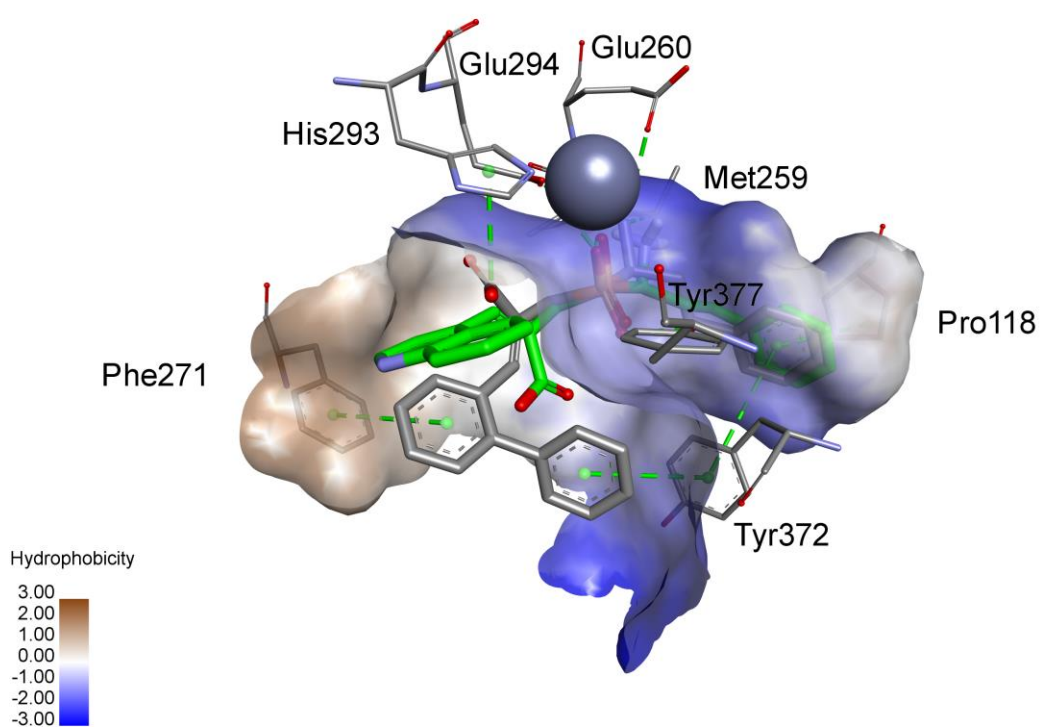

**Figure S3.** Modeled binding mode of a phosphinic dipeptide analog containing quinolin-4-yl (carbon atoms are colored light green) and biphenyl-2-yl (carbon atoms are colored gray) P1' fragments in the active center of *Neisseria meningitidis* aminopeptidase (PDB: 2GTQ). Inhibitor and enzyme amino acid residues are shown as sticks, while zinc ion as a grey sphere. Hydrogen bonds and non-polar interactions are shown as thin dashed lines. Surface represents the hydrophobicity of side chains the cavity amino acids.

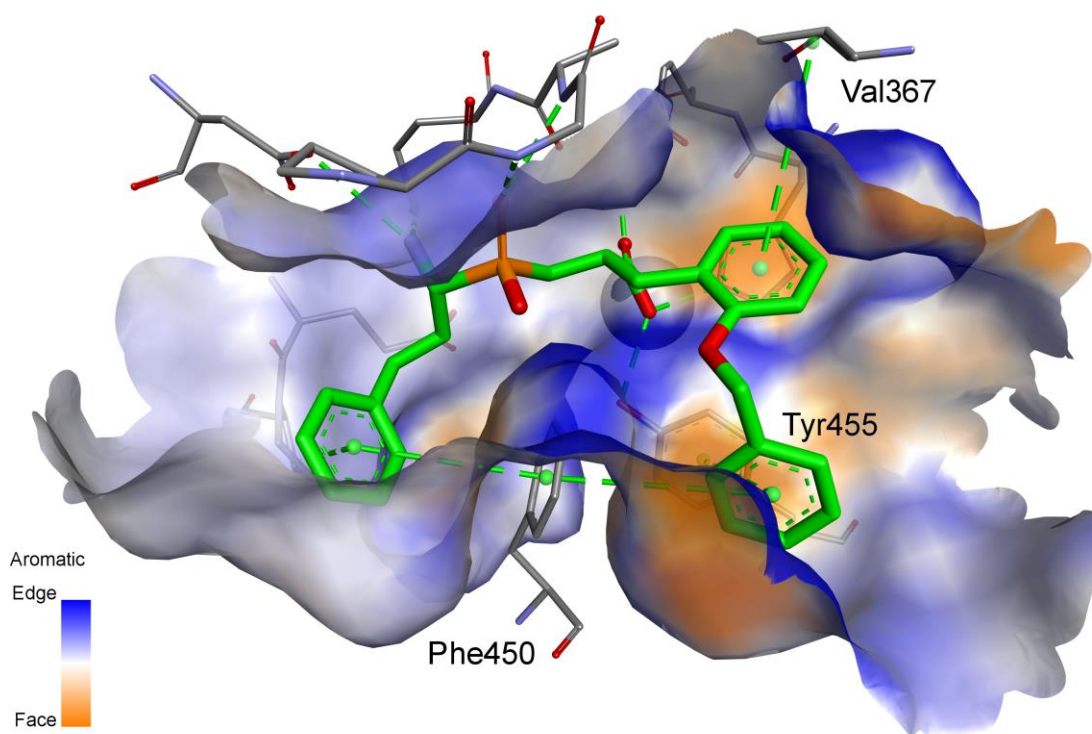

**Figure S4.** Modeled binding mode of a phosphinic dipeptide analog containing a 2-benzyloxyphenyl P1' fragment in the active center of ERAP2 aminopeptidase (PDB: 5AB0). Inhibitor and enzyme amino acid residues are shown as sticks, while zinc ion as a grey sphere. Hydrogen bonds and non-polar interactions are shown as thin dashed lines. Surface represents the type of possible aromatics interactions with the side chains of the cavity amino acids.



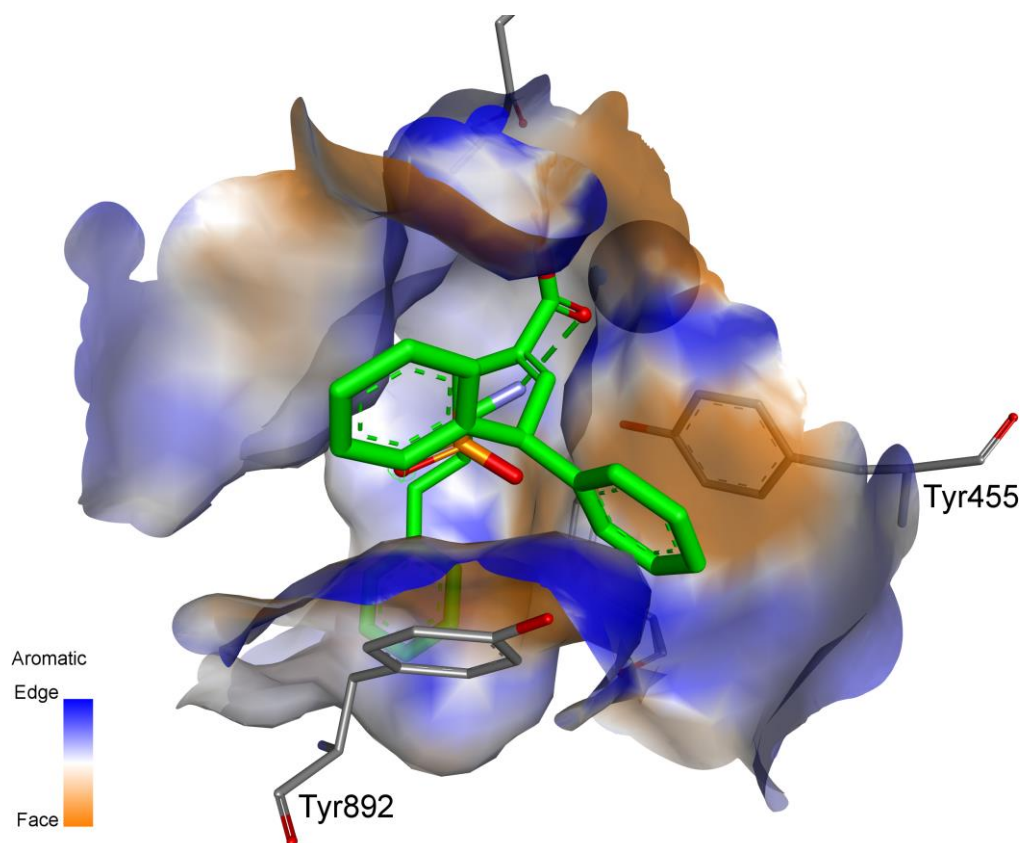

**Figure S5.** Modeled binding mode of a phosphinic dehydrodipeptide analog containing a diphenylmethyl P1' fragment in the active center of ERAP2 aminopeptidase (PDB: 5AB0). Inhibitor and enzyme amino acid residues are shown as sticks, while zinc ion as a grey sphere. Hydrogen bonds and non-polar interactions are shown as thin dashed lines. Surface represents the type of possible aromatics interactions with the side chains of the cavity amino acids.

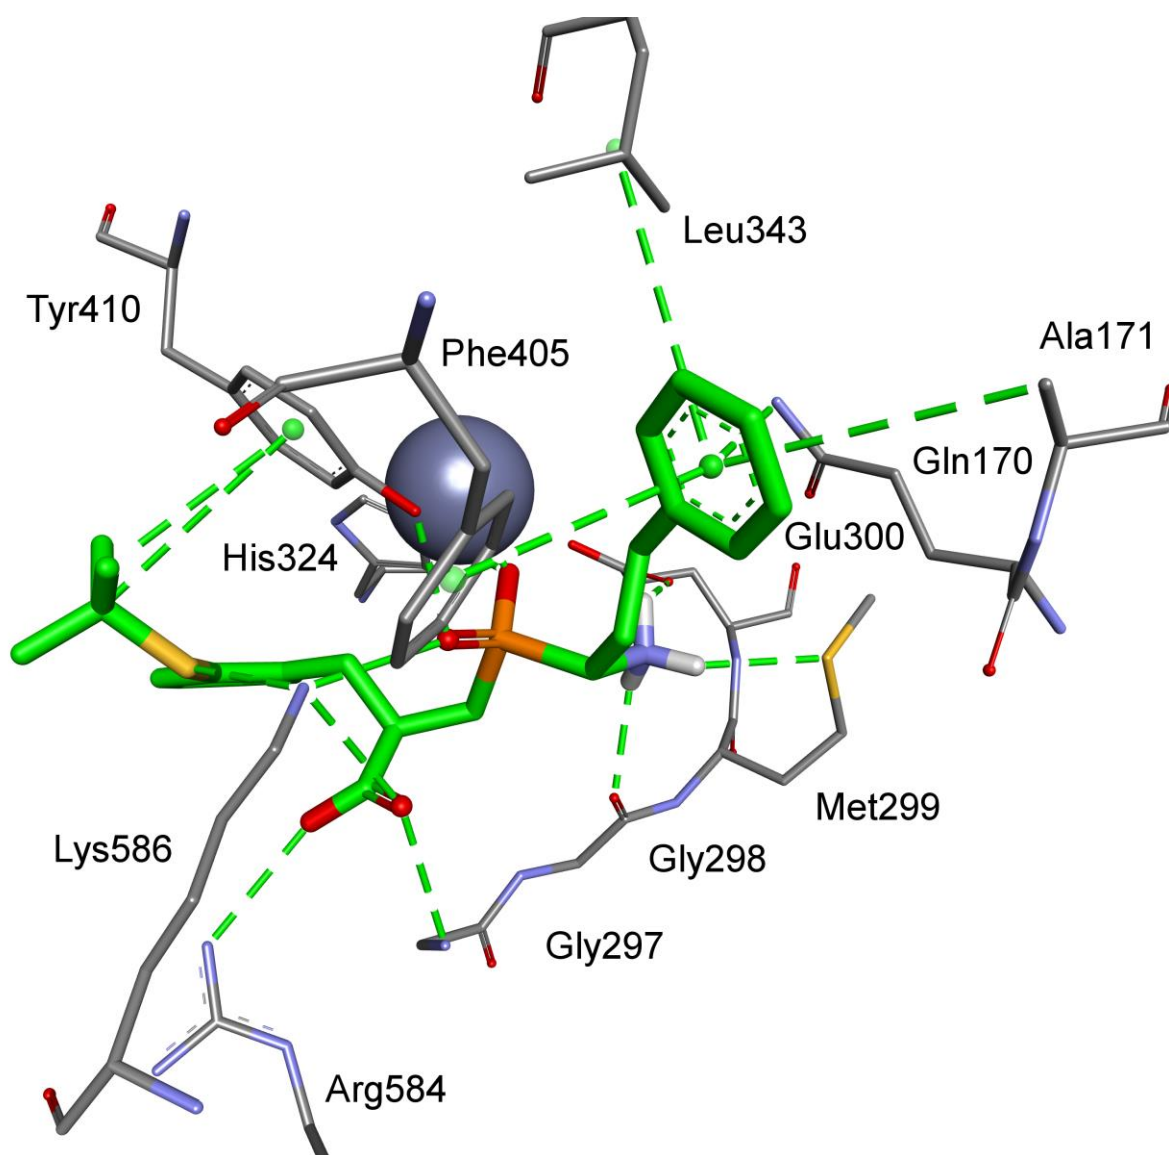

**Figure S6.** Modeled binding mode of a phosphinic dipeptide analog containing a *2-tert*-butylthiophenyl P1' fragment in the active center of cold-active aminopeptidase (PDB: 5AB0). Inhibitor and enzyme amino acid residues are shown as sticks, while zinc ion as a grey sphere. Hydrogen bonds and non-polar interactions are shown as thin dashed lines.



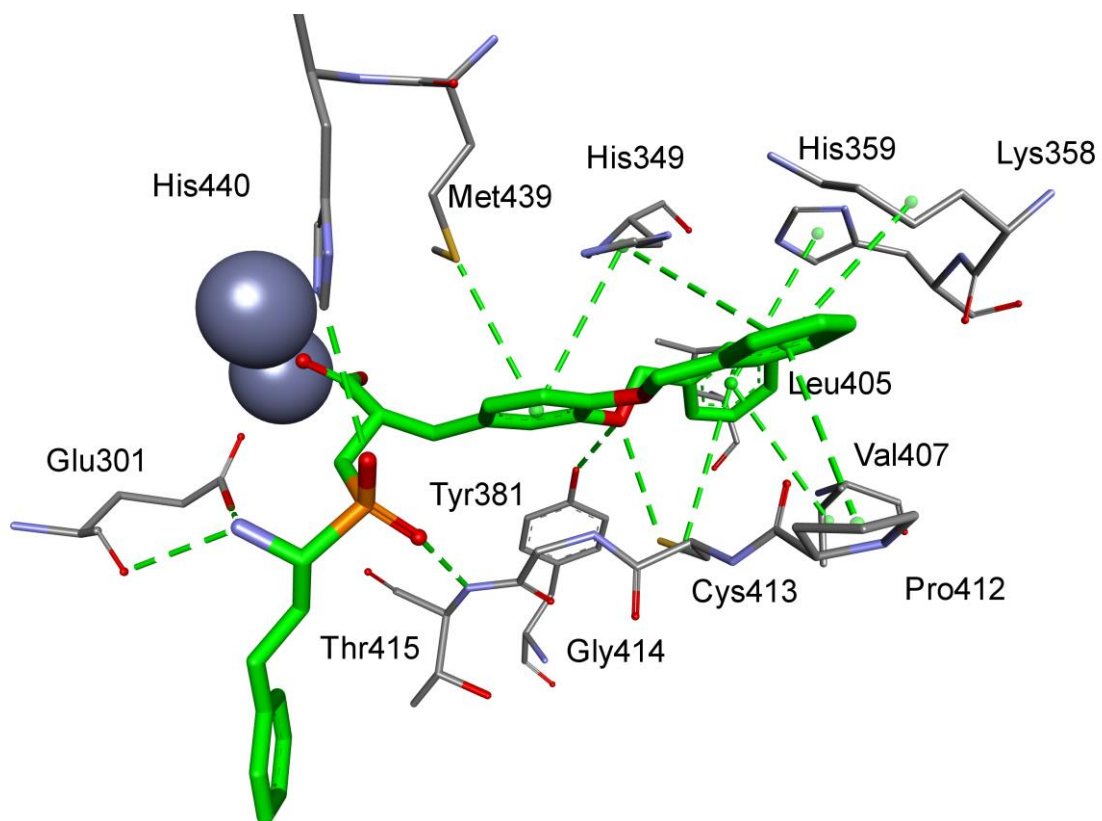

**Figure S8.** Modeled binding mode of a phosphinic dipeptide analog containing a 3,4-dibenzyloxyphenyl P1' fragment in the active center of aspartyl aminopeptidase (PDB: 4DYO). Inhibitor and enzyme amino acid residues are shown as sticks, while zinc ions as a grey spheres. Hydrogen bonds and non-polar interactions are shown as thin dashed lines.

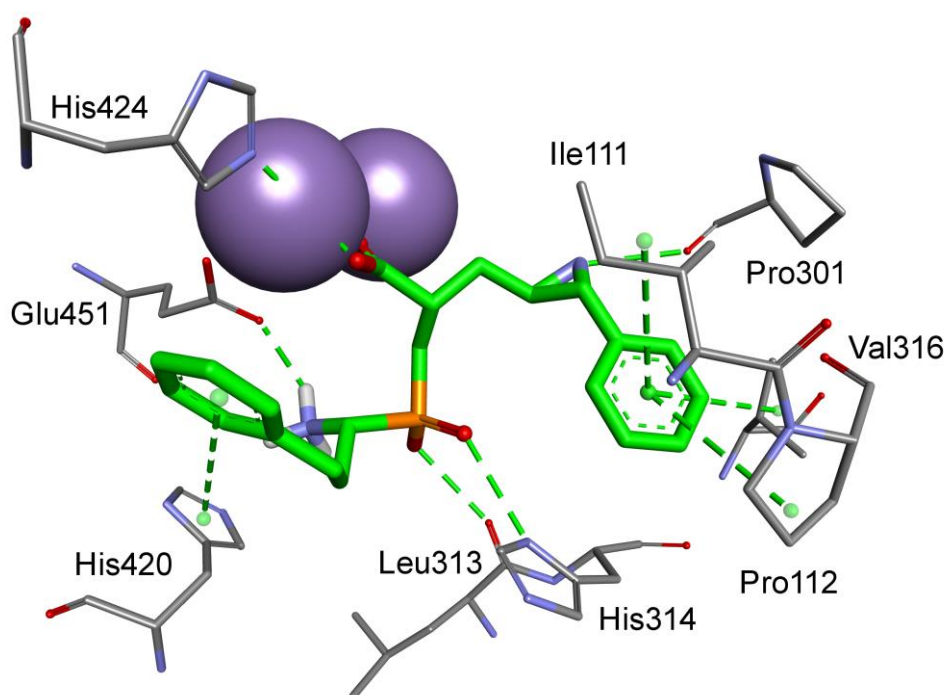

**Figure S9.** Modeled binding mode of a phosphinic dipeptide analog containing a 3-phenylaziridin-2-yl P1' fragment in the active center of aminopeptidase P3 (PDB: 5X49). Inhibitor and enzyme amino acid residues are shown as sticks, while manganese ions as a purple spheres. Hydrogen bonds and non-polar interactions are shown as thin dashed lines.

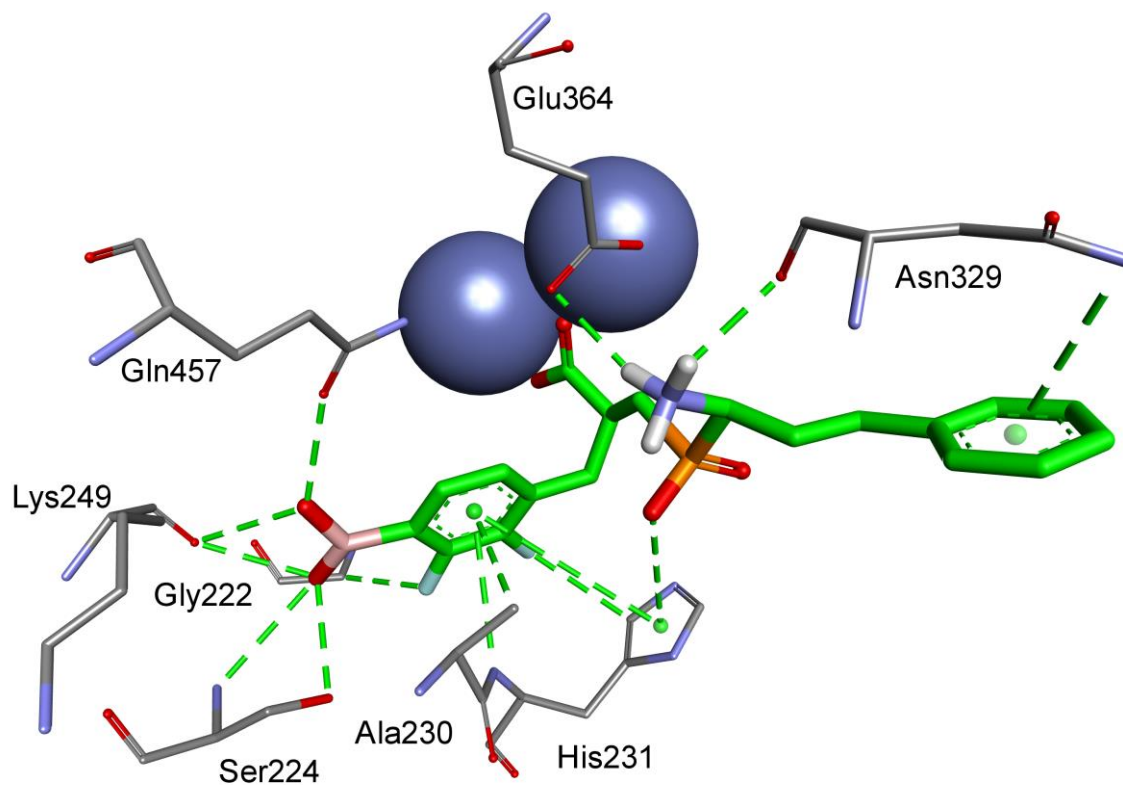

**Figure S10.** Modeled binding mode of a phosphinic dipeptide analog containing a 4-borono-2,3-difluorophenyl P1' fragment in the active center of methionyl aminopeptidase 2 (PDB: 1B6A). Inhibitor and enzyme amino acid residues are shown as sticks, while cobalt ions as a purple spheres. Hydrogen bonds and non-polar interactions are shown as thin dashed lines.

## S5. References

1. Vassiliou, S.; Węglarz-Tomczak, E.; Berlicki, Ł.; Pawełczak, M.; Nocek, B.; Mulligan, R.; Joachimiak, A.; Mucha, A. Structure-guided, single-point modifications in the phosphinic dipeptide structure yield highly potent and selective inhibitors of neutral aminopeptidases. *J. Med. Chem.* **2014**, *57*, 8140–8151.
2. Su, L.; Jia, Y.; Zhang, L.; Xu, Y.; Fang, H.; Xu, W. Design, synthesis and biological evaluation of novel amino acid ureido derivatives as aminopeptidase N/CD13 inhibitors. *Bioorg. Med. Chem.* **2012**, *20*, 3807–3815.
3. Yang, Y.; Liu, C.; Lin, Y.L.; Li, F. Structural insights into central hypertension regulation by human aminopeptidase A. *J. Biol. Chem.* **2013**, *288*, 25638–25645.
4. Orning, L.; Krivi, G.; Fitzpatrick, F.A. Leukotriene A4 hydrolase inhibition by bestatin and intrinsic aminopeptidase activity establish its functional resemblance to metallohydrolase enzymes. *J. Biol. Chem.* **1991**, *266*, 1375–1378.
5. Fournié-Zaluski, M.C.; Poras, H.; Roques, B.P.; Nakajima, Y.; Ito, K.; Yoshimoto, T. Structure of aminopeptidase N from *Escherichia coli* complexed with the transition-state analogue aminophosphinic inhibitor PL250. *Acta Crystallogr. Sect. D Biol. Crystallogr.* **2009**, *65*, 814–822.
6. Nikolaou, A.; Eynde, I. Van Den; Tourwé, D.; Vauquelin, G.; Tóth, G.; Mallareddy, J.R.; Poglitsch, M.; Van Ginderachter, J.A.; Vanderheyden, P.M.L. [3H]IVDE77, a novel radioligand with high affinity and selectivity for the insulin-regulated aminopeptidase. *Eur. J. Pharmacol.* **2013**, *702*, 93–102.
7. Papakyriakou, A.; Zervoudi, E.; Tsoukalidou, S.; Mauvais, F.-X.; Sfyroera, G.; Mastellos, D.C.; van Endert, P.; Theodorakis, E.A.; Vourloumis, D.; Stratikos, E. 3,4-Diaminobenzoic acid derivatives as inhibitors of the oxytocinase subfamily of m1 aminopeptidases with immune-regulating properties. *J. Med. Chem.* **2015**, *58*, 1524–1543.
8. Deprez-Poulain, R.; Flipo, M.; Piveteau, C.; Leroux, F.; Dassonneville, S.; Florent, I.; Maes, L.; Cos, P.; Deprez, B. Structure–activity relationships and blood distribution of antiplasmodial aminopeptidase-1 inhibitors. *J. Med. Chem.* **2012**, *55*, 10909–10917.
9. Węglarz-Tomczak, E.; Poręba, M.; Byzia, A.; Berlicki, Ł.; Nocek, B.; Mulligan, R.; Joachimiak, A.; Drag, M.; Mucha, A. An integrated approach to the ligand binding specificity of *Neisseria meningitidis* M1 alanine aminopeptidase by fluorogenic substrate profiling, inhibitory studies and molecular modeling. *Biochimie* **2013**, *95*, 419–428.
10. Chan, W.W.C. L-Leucinthiol - A potent inhibitor of leucine aminopeptidase. *Biochem. Biophys. Res. Commun.* **1983**, *116*, 297–302.
11. Dong, L.; Cheng, N.; Wang, M.W.; Zhang, J.; Shu, C.; Zhu, D.X. The leucyl aminopeptidase from *Helicobacter pylori* is an allosteric enzyme. *Microbiology* **2005**, *151*, 2017–2023.
12. Kale, A.; Pijning, T.; Sonke, T.; Dijkstra, B.W.; Thunnissen, A.M. Crystal structure of the leucine aminopeptidase from *Pseudomonas putida* reveals the molecular basis for its enantioselectivity and broad substrate specificity. *J. Mol. Biol.* **2010**, *398*, 703–714.
13. Kelly, J.A.; Neidle, E.L.; Neidle, A. An aminopeptidase from mouse brain cytosol that cleaves n-terminal acidic amino acid residues. *J. Neurochem.* **1983**, *40*, 1727–1734.
14. Teuscher, F.; Lowther, J.; Skinner-Adams, T.S.; Spielmann, T.; Dixon, M.W.A.; Stack, C.M.; Donnelly, S.; Mucha, A.; Kafarski, P.; Vassiliou, S.; i in. The M18 aspartyl aminopeptidase of the human malaria parasite *Plasmodium falciparum*. *J. Biol. Chem.* **2007**, *282*, 30817–30826.
15. Chai, S.C.; Ye, Q.Z. Metal-mediated inhibition is a viable approach for inhibiting cellular methionine

- aminopeptidase. *Bioorg. Med. Chem. Lett.* **2009**, *19*, 6862–6864.
16. Helgren, T.R.; Chen, C.; Wangtrakuldee, P.; Edwards, T.E.; Staker, B.L.; Abendroth, J.; Sankaran, B.; Housley, N.A.; Myler, P.J.; Audia, J.P.; i in. Rickettsia prowazekii methionine aminopeptidase as a promising target for the development of antibacterial agents. *Bioorg. Med. Chem.* **2017**, *25*, 813–824.
  17. Farrell, P.J.; Zopf, C.J.; Huang, H.J.; Balakrishna, D.; Holub, C.; Bilakovics, J.; Fanjul, A.; Matuszkiewicz, J.; Plonowski, A.; Rolzin, P.; i in. Using target engagement biomarkers to predict clinical efficacy of MetAP2 inhibitors. *J. Pharmacol. Exp. Ther.* **2019**, *371*, 299–308.
  18. Haldar, M.K.; Scott, M.D.; Sule, N.; Srivastava, D.K.; Mallik, S. Synthesis of barbiturate-based methionine aminopeptidase-1 inhibitors. *Bioorg. Med. Chem. Lett.* **2008**, *18*, 2373–2376.
  19. Mitra, S.; Sheppard, G.; Wang, J.; Bennett, B.; Holz, R.C. Analyzing the binding of Co(II)-specific inhibitors to the methionyl aminopeptidases from Escherichia coli and Pyrococcus furiosus. *J. Biol. Inorg. Chem.* **2009**, *14*, 573–585.
  20. Douangamath, A.; Dale, G.E.; D'Arcy, A.; Almstetter, M.; Eckl, R.; Frutos-Hoener, A.; Henkel, B.; Illgen, K.; Nerdinger, S.; Schulz, H.; i in. Crystal structures of staphylococcus aureus methionine aminopeptidase complexed with keto heterocycle and aminoketone inhibitors reveal the formation of a tetrahedral intermediate. *J. Med. Chem.* **2004**, *47*, 1325–1328.
  21. Alvarado, J.J.; Nemkal, A.; Sauder, J.M.; Russell, M.; Akiyoshi, D.E.; Shi, W.; Almo, S.C.; Weiss, L.M. Structure of a microsporidian methionine aminopeptidase type 2 complexed with fumagillin and TNP-470. *Mol. Biochem. Parasitol.* **2009**, *168*, 158–167.
  22. Prechel, M.M.; Orawski, A.T.; Maggiora, L.L.; Simmons, W.H. Effect of a new aminopeptidase P inhibitor, apstatin, on bradykinin degradation in the rat lung. *J. Pharmacol. Exp. Ther.* **1995**, *275*, 1136–1142.
  23. Sulpizio, A.C.; Pullen, M.A.; Edwards, R.M.; Louttit, J.B.; West, R.; Brooks, D.P. Mechanism of vasopeptidase inhibitor-induced plasma extravasation: Comparison of omapatrilat and the novel neutral endopeptidase angiotensin-converting enzyme inhibitor GW796406. *J. Pharmacol. Exp. Ther.* **2005**, *315*, 1306–1313.
  24. Drinkwater, N.; Sivaraman, K.K.; Bamert, R.S.; Rut, W.; Mohamed, K.; Vinh, N.B.; Scammells, P.J.; Drag, M.; McGowan, S. Structure and substrate fingerprint of aminopeptidase P from Plasmodium falciparum. *Biochem. J.* **2016**, *473*, 3189–3204.
  25. Ben-Meir, D.; Spungin, A.; Ashkenazi, R.; Bblumberg, S. Specificity of Streptomyces griseus aminopeptidase and modulation of activity by divalent metal ion binding and substitution. *Eur. J. Biochem.* **1993**, *212*, 107–112.
  26. Stamper, C.C.; Bienvenue, D.L.; Bennett, B.; Ringe, D.; Petsko, G.A.; Holz, R.C. Spectroscopic and X-ray crystallographic characterization of bestatin bound to the aminopeptidase from Aeromonas (Vibrio) proteolytica. *Biochemistry* **2004**, *43*, 9620–9628.
  27. Dutoit, R.; Brandt, N.; Legrain, C.; Bauvois, C. Functional characterization of two M42 aminopeptidases erroneously annotated as cellulases. *PLoS One* **2012**, *7*, e50639.
